1    Transcriptional responses of *Escherichia coli* during recovery from  
2                                    inorganic or organic mercury exposure

3

4        Stephen LaVoie (slavoie5@uga.edu) and Anne O. Summers\* (summers@uga.edu)

5

6                    Department of Microbiology, University of Georgia, Athens, Georgia 30602

7

8

9    Keywords: longitudinal RNA-Seq, transcriptomics, toxic metals, essential metals, stress  
10   response, biofilm, phenylmercury, antibiotic resistance

11

12

13

14

15

16

17

18

19

20

21

22

23

24 **ABSTRACT**

25 **Background:** The protean chemical properties of mercury have long made it attractive  
26 for diverse applications, but its toxicity requires great care in its use, disposal, and  
27 recycling. Mercury occurs in multiple chemical forms, and the molecular basis for the  
28 distinct toxicity of its various forms is only partly understood. Global transcriptomics  
29 applied over time can reveal how a cell recognizes a toxicant and what cellular  
30 subsystems it marshals to repair and recover from the damage. The longitudinal effects  
31 on the transcriptome of exponential phase *E. coli* were compared during sub-acute  
32 exposure to mercuric chloride (HgCl<sub>2</sub>) or to phenylmercuric acetate (PMA) using RNA-  
33 Seq.

34 **Results:** Differential gene expression revealed common and distinct responses to the  
35 mercurials throughout recovery. Cultures exhibited growth stasis immediately after each  
36 mercurial exposure but returned to normal growth more quickly after PMA exposure  
37 than after HgCl<sub>2</sub> exposure. Correspondingly, PMA rapidly elicited up-regulation of a  
38 large number of genes which continued for 30 min, whereas fewer genes were up-  
39 regulated early after HgCl<sub>2</sub> exposure only some of which overlapped with PMA up-  
40 regulated genes. By 60 min gene expression in PMA-exposed cells was almost  
41 indistinguishable from unexposed cells, but HgCl<sub>2</sub> exposed cells still had many  
42 differentially expressed genes. Relative expression of energy production and most  
43 metabolite uptake pathways declined with both compounds, but nearly all stress  
44 response systems were up-regulated by one or the other mercurial during recovery.

45 **Conclusions:** Sub-acute exposure influenced expression of ~45% of all genes with  
46 many distinct responses for each compound, reflecting differential biochemical damage

47 by each mercurial and the corresponding resources available for repair. This study is  
48 the first global, high-resolution view of the transcriptional responses to any common  
49 toxicant in a prokaryotic model system from exposure to recovery of active growth.  
50 Many genes encoding the responses provoked by these two mercurials are highly  
51 conserved evolutionarily, affording insights about how higher organisms may respond to  
52 these ubiquitous metal toxicants.

53

## 54 **BACKGROUND**

55 The common metallic element mercury (Hg) has no beneficial biological function  
56 but its chemical similarities to essential transition metals such as zinc, copper, and iron  
57 make it highly toxic to all living systems. Global mercury emissions range from 6500 to  
58 8500 Mg annually with estimates of 50% [1, 2] and even two-thirds [3] being  
59 anthropogenic and the rest from volcanism. Mercury exists in multiple chemical forms  
60 that are readily susceptible to abiotic and biotic inter-conversions [4]. Mercury occurs  
61 naturally as the insoluble HgS ore (cinnabar), as inorganic complexes of Hg<sup>+2</sup>, Hg<sup>+1</sup>, or  
62 (Hg<sub>2</sub>)<sup>2+</sup> of varying solubility depending on available ligands, and as organomercurials  
63 generated by microbial and anthropogenic processes.

64 Major sources of chronic mercury exposure in humans include dental amalgam  
65 fillings [5, 6], consumption of fish containing methylmercury [7], and artisanal gold  
66 mining operations [8]. Organomercurials, like phenylmercury, methylmercury, and  
67 merthiolate (ethylmercury) have historically been used in medical, industrial and  
68 agricultural applications as antimicrobial or fungicidal agents [9-11]. The toxic effects of

69 mercury exposure in humans are associated with neurological, kidney, liver,  
70 gastrointestinal, and developmental disorders [9, 12-15].

71 Like other common electrophilic toxic metals such as arsenic, cadmium, and  
72 lead, there is no single biochemical target for mercury damage. Mercury has a strong  
73 affinity for sulfur and selenium [16, 17] and therefore targets the cellular thiol pool,  
74 composed of glutathione and cysteine thiol groups of proteins [9] and selenocysteine, a  
75 rare but critical amino acid in proteins involved in redox defense and thyroid function  
76 [18]. Depletion of the cellular thiol pool and disruption of the cellular membrane potential  
77 by mercury can induce oxidative stress and apoptosis pathways in mitochondria [19,  
78 20]. However, there is no evidence that mercury itself undergoes Fenton-type chemistry  
79 to generate reactive oxygen species like iron and copper [21].

80 In earlier work we used global proteomics to identify stable mercury-protein  
81 binding sites in growing *E. coli* cells exposed to acute levels of organic or inorganic Hg  
82 [22]. We found cysteine sites in several hundred proteins, many highly conserved  
83 evolutionarily, that formed stable adducts with one or more of these mercurials,  
84 consequently disrupting many cellular processes such as iron homeostasis and the  
85 electrolyte balance [23]. Importantly, we found that organic and inorganic mercurials  
86 had distinct effects on these cellular processes and distinct protein structural  
87 preferences. Although the pathobiology of organic and inorganic mercurials has been  
88 known for decades to differ, with methyl- and ethyl-mercury recognized as neurotoxic  
89 and inorganic mercury as neurotoxic, nephrotoxic, hepatotoxic, and immunotoxic, no  
90 previous studies at that time had assessed the biochemical underpinnings of these  
91 distinctions on a global scale in any model system.

92 Motivated by our proteomics observations and by microarray data from *C.*  
93 *elegans* showing distinct transcriptional single end point response and toxicity for  
94 inorganic and organic mercurials [24], we applied RNA-Seq to examine the  
95 transcriptional effects of HgCl<sub>2</sub> and phenylmercuric acetate (PMA) exposure on *E. coli*  
96 K-12 MG1655 over time. This is the first study to examine the transcriptional response  
97 to mercury exposure in a microorganism and the only study to compare directly the  
98 effects of different compounds over time through recovery. The changes in gene  
99 expression were idiosyncratic for each compound, confirming and extending the idea  
100 that the cell suffers overlapping but distinct biochemical damage and marshals both  
101 distinct and overlapping recovery processes in response to these chemically distinct  
102 mercurials. Although our work was in a bacterium, the high evolutionary conservation of  
103 many of the proteins we identified as mercury-vulnerable offers insights for the  
104 toxicology of mercury compounds in higher organisms.

105

## 106 **METHODS**

### 107 ***Cell cultures.***

108 For each biological RNA-Seq replicate *E coli* K-12 MG1655 was subcultured from  
109 cryostorage on Luria-Bertani (LB) agar overnight at 37°C. A half-dozen well-isolated  
110 colonies were used to inoculate a 20 ml starter culture in Neidhardt MOPS Minimal  
111 Medium (NM3) [25] (0.2% final glucose concentration) supplemented with 20 mg/L  
112 uracil and 500 µg/L thiamine, which was incubated at 37°C with shaking at 250 rpm  
113 overnight (~18 hr). The overnight starter culture was diluted 1:30 to initiate the  
114 experimental culture and divided into three 500 ml flasks with 100 ml NM3 in each,

115 which were incubated at 37°C with shaking at 250 rpm. When cultures reached  $OD_{595} \approx$   
116 0.470 (~ 200 min), two cultures were made 3  $\mu$ M mercuric chloride ( $HgCl_2$ ) or 3  $\mu$ M  
117 phenylmercuric acetate (PMA) and the third was left as an unexposed control. Mercury  
118 stocks were prepared fresh for each growth experiment: 10 mM  $HgCl_2$  (Fisher) in water  
119 and 5 mM PMA (Sigma) in 25% dimethyl sulfoxide DMSO (Fisher), which is 2.1 mM or  
120 0.015% v/v final concentration DMSO in culture. These mercurial exposures were  
121 chosen from prior pilot experiments to find exposure conditions ( $OD_{595}$ , mercurial  
122 concentration and sampling times) that displayed a marked decrease in growth rate  
123 relative to the unexposed control but allowed subsequent restoration of rapid growth  
124 rate (i.e. recovery) within 1 hr (approximately one generation in NM3) after mercurial  
125 exposure. Duplicate 1-ml aliquots of each culture were collected at 0 (unexposed  
126 control only), 10, 30, 60 min after mercurial exposure and immediately centrifuged at  
127 20,800  $\times g$  for 3 min at 4°C. Spent medium was aspirated and cell pellets were frozen at  
128 -70°C within 5 min after collection. Seven biological replicates were prepared following  
129 this protocol and the average variance for all replicates in culture optical density over  
130 each 90-min experiment ranged from 0.0019 – 0.0073. The three biological replicates  
131 with the lowest variance between growth curves (range from 0.0007 – 0.0017 for all  
132 time points) were prepared for RNA-Seq.

133

### 134 ***Purification of mRNA***

135 One cell pellet from each condition and sampling time was thawed on ice; total  
136 RNA was isolated by RNAsnap™ [26] and stored at -70°C. DNA contamination was  
137 removed by two treatments with Turbo-DNase (Ambion; Life Technologies). RNA

138 concentrations and  $A_{260}/A_{280}$  ratios were determined using a Nanodrop™ 1000  
139 spectrophotometer (Thermo Scientific). Ribosomal RNA depletion was performed with  
140 the Ribo-Zero™ rRNA removal kit for Gram-negative bacteria (Epicentre) and  
141 concentrated using RNA Clean and Concentrator™ -5 columns (Zymo Research)  
142 following the manufacturer's instructions. Purified mRNA was quantified using the  
143 Nanodrop™ and stored at -70°C.

144

### 145 ***Library Preparation and Next-generation Sequencing***

146 The quality and quantity of rRNA-depleted RNA was assessed on a 2100  
147 Bioanalyzer RNA pico chip (Agilent Technologies) using the manufacturer's  
148 recommendations. Next-generation sequencing (NGS) libraries were prepared using the  
149 Kapa biosystems NGS stranded library prep kit for RNA-Seq with dual indexed Illumina  
150 adapters. Library insert size was ~150 bp, as determined by high-sensitivity NGS  
151 fragment analysis kit for Fragment Analyzer™ (Advanced Analytical Technologies) using  
152 the manufacturer's instructions. Quantification of each library was done by qPCR and all  
153 30 libraries were pooled in equal concentrations. The library preparation, quality  
154 analysis, and pooling were performed by the Georgia Genomics Facility  
155 (<http://dna.uga.edu>). Paired-end (2 x 50 bp) sequencing of the pooled libraries using the  
156 Illumina HiSeq 2000 platform was performed by the HudsonAlpha Institute for  
157 Biotechnology Genomic Services Laboratory (<http://gsl.hudsonalpha.org>). See Table S1  
158 for index and filename information for data uploaded to NCBI Gene Expression  
159 Omnibus database (<http://www.ncbi.nlm.nih.gov/geo/>) with accession ID: GSE95575.

160

## 161 **Data Processing and Differential Expression Analysis**

162 Quality control processing of sequence data was performed using Galaxy  
163 (<https://galaxyproject.org>) on the Georgia Advanced Computing Resource Center at the  
164 University of Georgia. The FASTX tools in Galaxy  
165 ([http://hannonlab.cshl.edu/fastx\\_toolkit](http://hannonlab.cshl.edu/fastx_toolkit)) were used for filtering by quality (80% of  
166 sequence  $\geq$  quality score of 20), then reads were trimmed at both 5' and 3' ends using a  
167 window and step size of 1 with quality score  $\geq$  20. Forward- and reverse-read mate-  
168 pairs were assembled and aligned to the *Escherichia coli* MG1655 K-12 genome using  
169 Bowtie2 [27]. SAMtools [28] was used to convert Bowtie2 output (.bam file) to SAM  
170 format. The number of sequence reads that aligned to features in the annotation file  
171 (*Escherichia\_coli\_str\_k\_12\_substr\_mg1655.GCA\_000005845.2.24.gtf* from  
172 <http://bacteria.ensembl.org>) were tabulated from the resulting SAM alignment files using  
173 the HTSeq-count program [29] with intersection non-empty mode. Mapped read counts  
174 were analyzed for differential expression (false discovery rate of  $\leq$  0.01, fold-change  $\geq$   
175 2) using the baySeq package in R [30]. Within baySeq, two-way comparisons using  
176 quantile normalization were made for all three biological replicate transcriptomes over  
177 time for HgCl<sub>2</sub> exposure or PMA exposure versus the unexposed control. We also  
178 examined changes over time in the unexposed control culture itself.

179

## 180 **RESULTS**

### 181 ***Effects of sub-acute mercury exposure on growth of MG1655.***

182 We defined sub-acute exposure as the concentration of mercury that clearly  
183 inhibited growth relative to the unexposed control but allowed cells to resume growth



184 within 1 hour or approximately one generation in this medium (Figure 1a, Figure S1).  
185 Based on pilot experiments the appropriate dose proved to be 3  $\mu\text{M}$  for both mercurials.  
186 Exposure to 4 - 5  $\mu\text{M}$   $\text{HgCl}_2$  prevented growth resumption during 1 hr and the effects of  
187 PMA exposure were similar at 3 and 5  $\mu\text{M}$ ; exposure to 2.5  $\mu\text{M}$  of either mercurial did  
188 not consistently retard growth (data not shown).

189 Cell-associated Hg (Table S2 and Supp Info Methods) declined slowly as has  
190 been reported previously for low level  $\text{HgCl}_2$  exposure of Hg sensitive cells and was  
191 attributed to non-specific endogenous reductants [31-33]. Bound Hg in cells exposed  
192 either to  $\text{HgCl}_2$  or to PMA declined similarly from ~50% of total Hg added to culture at  
193 10 min to ~20% at 30 min, after which Hg loss from PMA-exposed cells continued to  
194 decline to 11% of input at 60 min. In contrast, cell-associated Hg in cells exposed to  
195  $\text{HgCl}_2$  increased from 24% at 30 to 47% at 60 min. Presently, we have no simple  
196 explanation for this unexpected difference in cell-bound Hg in late exponential phase  
197 cultures, however it does echo our finding that cultures acutely exposed to 40 $\mu\text{M}$  or 80  
198  $\mu\text{M}$  PMA or  $\text{HgCl}_2$  bound 24% or 208% more Hg(II) than PhHg, respectively [23]. Also  
199 notable was a brief drop in the culture optical density immediately after PMA exposure  
200 consistent with some cell lysis as has been reported [34]. The lack of apparent lysis  
201 after divalent  $\text{HgCl}_2$  exposure may be due to its ability to cross-link cell envelope  
202 proteins via their cysteines, which is not possible for monovalent PMA.

203

#### 204 ***Transcriptome benchmarks***

205 Paired-end libraries averaged over 9.5 million reads and mapped reads provided  
206 an average of 143X coverage (Figure S2). The sequencing data were of high quality,

207 requiring removal of only 11% as low-quality reads. Of the high-quality reads, 97% of  
208 reads mate-paired, 99.4% of paired reads mapped to the genome and 82% of reads  
209 mapped to an annotated genome feature on average from all libraries.

210 Overall 89% of annotated mapped reads were to coding regions (CDS) based on  
211 raw un-normalized read counts per gene output from HTseq-count program [29](Figure  
212 S3, Table S3, Table S4). Pearson correlations of raw read counts confirmed that no  
213 strong biases were introduced in biological replicates for each condition (Figures S4-  
214 S6). That dispersion is slightly greater in both mercury exposure conditions than in  
215 unexposed cultures, especially at later time points, is consistent with perturbations of  
216 multiple cellular processes.

217 Mapped reads to rRNA constituted only 0.3% of total reads (std. dev. = 0.425) on  
218 average for all libraries (Table S3) consistent with effective Ribo-Zero™ rRNA removal.  
219 In the unexposed culture non-coding RNA's (ncRNA) were 4% of total reads over all  
220 time points, but their percentage increased in mercury exposure conditions indicating  
221 greater differential expression of some ncRNA genes (details below). The very  
222 abundant tmRNA (*ssrA*) needed for rescuing stalled ribosomes [35] was 6% of total  
223 reads in the unexposed condition and although this percentage increased for mercury  
224 exposure conditions, the tmRNA gene (*ssrA*) was not differentially expressed under any  
225 condition. Pseudogenes accounted for less than 1% of total reads, but up to 35%  
226 ( $\text{HgCl}_2$ ) and 13% (PMA) of them were significantly up-regulated. The tRNA's were less  
227 than 1% of total reads because the library preparation method we used was not  
228 optimized for such small RNAs. However, approximately 35% of these observed tRNA

229 genes were significantly down-regulated during the first 30 min after exposure to either  
230 mercurial.

231

232 ***HgCl<sub>2</sub> and PMA transcriptional responses are not the same.***

233 We expected that differentially expressed genes (DEGs) in the mercury exposure  
234 conditions (compared to the unexposed cells) would change over time as the cells  
235 transitioned from initial growth stasis back into a normal growth rate. We also expected  
236 that some DEG responses would be similar because both mercurials are thiophilic and  
237 will bind to the cellular thiol redox buffer, glutathione (GSH), and to protein cysteine  
238 residues. However, since there are physiological differences and protein site  
239 preferences for each compound in acute Hg(II)- or PMA-exposure [23 and Zink et. al. in  
240 preparation] we aimed here at a low exposure using a longitudinal protocol to discern  
241 more subtle distinctions between these mercurials as the cells experienced stasis and  
242 then recovered their growth rate. In the following sections, we first describe the bulk  
243 measures of gene expression over time and then describe differences in specific  
244 functional pathways.

245

246 ***Differentially expressed genes: the view from 30,000 feet.***

247 *a. Differentially expressed genes (DEG) for each condition and time point*

248 DEGs were determined by pairwise comparisons of mercury exposure conditions  
249 relative to the unexposed culture at the corresponding time point (Figure 1b and Table  
250 S5). Ten minutes after exposure, expression of 41% or 49% of the 4,472 non-rRNA  
251 genes changed significantly for HgCl<sub>2</sub> or PMA-exposed cells, respectively (Figure 1b).

252 At 30 min with growth still arrested, 32% of genes in the HgCl<sub>2</sub>-exposed cells were  
253 differentially expressed (Figure 1b), (Figure 1a, red). In contrast, PMA-exposed cells at  
254 30 min began to recover their prior growth rate (Figure 1a, green), but 45% of their  
255 genes remained differentially expressed (Figure 1b). By 60 min, the PMA-exposed cells  
256 were growing at nearly their pre-exposure rate and only 1.5% of genes were  
257 differentially expressed, whereas the HgCl<sub>2</sub>-exposed cells were still growing more  
258 slowly than pre-exposure with 13% of their genes still differentially expressed compared  
259 to the unexposed cells (Figure 1b).

260

261 *b. Shared and unique genes at each time point for each exposure.*

262 The total distinct DEGs across all time points was slightly lower for HgCl<sub>2</sub> (2,327)  
263 than for PMA (2,541) exposure (Figure 1b and Figure S7). More striking were the  
264 differences in DEGs at each time point; PMA-exposed cells modulated 20% more genes  
265 at 10 min (2,181 vs 1,821) and 40% more at 30 min (2,007 vs 1,422) than HgCl<sub>2</sub>  
266 exposed cells. This trend completely reversed by 60 min when DEGs declined in both  
267 exposure conditions but HgCl<sub>2</sub> exposed cells were still modulating ~9-fold more genes  
268 (563) than PMA-exposed cells (65), consistent with the latter recovering normal growth  
269 sooner (Figure 1a). Also notable is the carryover of DEGs from one time point to the  
270 next where HgCl<sub>2</sub> exposed cells have 1,001 DEGs in common at 10 and 30 min after  
271 exposure but that number is 65% greater in PMA-exposed cells (1,650) (Figure S7).  
272 However, HgCl<sub>2</sub> exposed cells have 52% more DEGs that are unique at 10 min  
273 compared to PMA-exposed cells (804 vs 529), i.e. more HgCl<sub>2</sub> provoked DEGs occur  
274 sooner after exposure than later. HgCl<sub>2</sub> exposure also yields more DEGs that occur at

275 all time points compared to PMA (Figure S7) since there are very few DEGs at 60 min  
276 for PMA exposure.

277

278 *c. Up-regulated vs. down-regulated genes for each exposure*

279         Sorting expression simply into genes up-regulated or down-regulated by HgCl<sub>2</sub> or  
280 PMA at each time point (Figure 2) revealed additional quantitative distinctions between  
281 them. For up-regulated genes, PMA-provoked more unique DEGs than DEGs in  
282 common with HgCl<sub>2</sub> exposure at all time points, in contrast to HgCl<sub>2</sub> which had more  
283 DEGs in common than unique at all but the last time point. This trend was not continued  
284 for down-regulated genes where more genes were in common for both compounds than  
285 unique at all time points.

286         Thus, early in exposure the cell reduced expression of a similar number of genes  
287 for both mercurials, but up-regulated expression of many more genes in response to  
288 PMA than to HgCl<sub>2</sub>, and these distinct trends persisted to the middle time point. By 60  
289 min, gene expression of PMA-exposed cells closely resembled that of unexposed cells,  
290 but HgCl<sub>2</sub> exposed cells still have many up- and down-DEGs, consistent with slower  
291 growth rate recovery by HgCl<sub>2</sub> exposed compared to PMA-exposed cells (Figure 1a).

292

293 *d. Differentially expressed genes grouped by functional category.*

294         To sort our observations from a different perspective, the DEGs for each  
295 condition were grouped by Clusters of Orthologous Groups (COGs) to identify  
296 expression differences based on gene functions (Figure 3 and Table S6). For most  
297 COGs, both mercurials elicited the strongest response, up or down, within the first 10

298 min of exposure (Figure 3); in most cases, the responses were of similar magnitude. At  
299 30 min, the PMA (green) responses remained nearly the same, up or down, but HgCl<sub>2</sub>  
300 provoked responses (red) generally diminished, often sharply. By 60 min, expression in  
301 PMA-exposed cells was barely distinguishable from the unexposed cells in all COG  
302 categories, whereas HgCl<sub>2</sub> exposed cells had notable differential expression in most  
303 COG categories.

304       The four well-defined COG categories with the most DEGs were energy  
305 production (C), amino acid metabolism (E), carbohydrate metabolism (G), and  
306 transcription (K), which are also categories with a large number of genes (284, 355,  
307 381, and 294 respectively) in *E. coli* (Figure 3 legend). COG categories R and S  
308 encoding poorly defined (261) or non-defined (203) genes were also represented  
309 proportionally. These data suggest both mercurials broadly affect most metabolic  
310 categories, albeit to different degrees and at different rates. However, four well-defined  
311 COG categories have strikingly different responses to HgCl<sub>2</sub> and PMA. COG categories  
312 for nucleotide metabolism (F), translation (J), motility (N), and intracellular trafficking (U)  
313 have much less up-regulation in HgCl<sub>2</sub> exposed cells than in PMA-exposed cells. There  
314 are relatively few DEGs involved in cell division (D), extracellular structures (W), and  
315 mobile genetic elements (X) and genes within these categories responded similarly to  
316 both mercurials. Thus, grouping DEGs by COGs emphasizes the broad functional  
317 differences and similarities between HgCl<sub>2</sub> and PMA exposure. Furthermore, this  
318 approach highlights that DEGs occur in all functional categories for both compounds,  
319 but still display distinct differences in transcriptional response to each compound. We  
320 provide gene-level detail on several of these functional groups below. Note that the

321 COG database only includes functional annotations for 3,398 of *E. coli*'s 4,497 genes,  
322 but functional categories discussed below in more detail are not limited to COG-  
323 annotated genes.

324 A heat map of the DEGs log-fold changes (Figure 4) provides a more granular  
325 look at all DEGs for both compounds across all time points. The heat map, using Ward's  
326 minimum variance clustering method [36], shows considerable uniformity of up- and  
327 down-regulated expression during the 30 min after PMA exposure. In contrast, although  
328 HgCl<sub>2</sub> exposed cells grossly shared many DEGs with PMA-exposed cells (Figure 2), the  
329 heat map reveals a more variegated response to Hg(II) in which different genes are up-  
330 or down-regulated at all time points, in contrast to the relatively consistent response of  
331 PMA during recovery. Overall, 34% of DEGs are unique to only one mercurial and ~3%  
332 of all DEGs had an opposite response to each compound (Table S5). The most  
333 dramatic differences were at 60 min when HgCl<sub>2</sub> exposed cells were still modulating  
334 many genes but PMA-exposed cells had only minor differences with unexposed cells,  
335 consistent with their faster recovery of normal growth (Figure 1a). We dissect some of  
336 these differences in function-specific heat maps below.

337 We also used STRING (version 10.0) [37, 38] for unsupervised network analysis  
338 to identify gene clusters that were up-regulated in response to each compound (Figure  
339 S8 and Table S7). We focused on up-regulated genes on the working assumption that  
340 they are more likely to contribute to recovery than genes whose expression is turned  
341 down. Gene clusters were generated by STRING based on organism specific data  
342 mining to identify genes with a functional association, such as a common biological  
343 purpose, location within the same operon, or shared regulatory mechanism. Note that

344 this network algorithm does not consider fold-change intensity of response; it  
345 enumerates only whether an up-regulated gene is present at a given time point. The up-  
346 regulated DEGs (nodes) of HgCl<sub>2</sub> exposed cells formed several tight clusters  
347 encompassing 16 gene-ontology functions (GOFs) at 10 min, nine GOFs at 30 min, and  
348 seven GOFs at 60 min (Figure S8 and Table S7). In contrast, although there were more  
349 nodes for PMA-exposure at 10 and 30 min, there were fewer edges yielding no well-  
350 defined clusters at 10 min and only two GOFs at 30 min. This network analysis  
351 suggests that, although PMA provokes more DEGs than Hg(II) does, there is less  
352 functional congruence between the genes involved in the response to PMA. Specific  
353 gene and function changes are discussed further in the next section.

354       Lastly, as a control for using RNA-Seq in a longitudinal experiment, we observed  
355 DEGs at sequential time points in the unexposed control culture (Figure S9 and Table  
356 S8). As expected, changes were gradual over time with no more than 5% of the  
357 genome being differentially expressed from one time point to the next. At the 60 min  
358 time point, as the cells approached stationary phase 815 genes were differentially  
359 expressed compared to mid-log (time 0). Sorting these DEGs by COGs (Figure S9) and  
360 by STRING network analysis (Figure S10 and Table S7) showed, as expected, many  
361 DEGs were consistent with normal transitioning from mid-log to early stationary phase  
362 [39, 40].

363

364 ***Higher resolution view of expression differences in specific functional groups***  
365 ***during recovery from exposure to HgCl<sub>2</sub> or PMA***



366 Taking the perspective that a toxicant is a kind of signaling molecule, we  
367 considered differences in gene expression for the two Hg compounds to reflect how the  
368 cell senses the biochemically distinct damage produced by these two metallo-  
369 electrophiles as manifest by what tools the cell calls upon to restore its viability. A quick  
370 snapshot of the great extent of these compound-specific differences can be seen in the  
371 genes with a >20-fold increase in differential expression after HgCl<sub>2</sub> exposure (Table 1)  
372 or PMA exposure (Table 2). Here we emphasize up-regulated genes on the working  
373 assumption they could contribute directly or indirectly to repairing damage caused by  
374 mercurial exposure. The 25 genes highly up-regulated by HgCl<sub>2</sub> (Table 1) are involved  
375 in altering the cell surface, oxidative stress response and repair, protein chaperones,  
376 metals homeostasis, and ribonucleotide reductase. The vestigial prophage genes likely  
377 play no rescue role for the cell and were simply activated by generalized stress  
378 responses. The corresponding PMA response echoed only 8 of these 25 HgCl<sub>2</sub> high-  
379 responders, and notably did not include the vestigial phage genes.

380 For PMA, the highly up-regulated genes are a distinct contrast to those for HgCl<sub>2</sub>.  
381 First, the maximum amplitude of the PMA-provoked differential expression is generally  
382 much less than for Hg(II)-provoked high differential expression (Table 1), which could  
383 reflect the lower uptake of PMA. Secondly, while 11 of the 17 PMA-provoked genes  
384 were also on the HgCl<sub>2</sub> highly differential expression list, ion transport and antibiotic  
385 resistance loci were more prominent with PMA and prophage genes were absent.

386 These two snapshot tables make the points that both mercurials generate broad,  
387 but idiosyncratic, cellular responses. To place these “tips of many icebergs” in their  
388 larger cellular context, we used heat maps and tables of subsets of functionally related

389 genes to discuss the differential effects of HgCl<sub>2</sub> and PMA on twelve canonical cellular  
390 systems in the following sections.

391

#### 392 i. INFORMATIONAL MACROMOLECULES

##### 393 (a) DNA replication, recombination and repair

394 Of the 24 genes for initiation and maintenance, and termination of chromosome  
395 replication, there were more genes down-regulated (8) than up-regulated (3) in  
396 response to HgCl<sub>2</sub> and an equal number up- or down-regulated genes (7) in response to  
397 PMA (Table S9). Of the 14 genes encoding the replicative polymerase holoenzyme, four  
398 genes capable of translesion synthesis (*polB*, *dinB*, *umuCD*) were up-regulated more by  
399 HgCl<sub>2</sub> exposure (Table S9), suggesting a greater degree of direct or indirect DNA  
400 damage by HgCl<sub>2</sub> exposure. Of the 45 genes for repair and recombination proteins the  
401 transcriptional response to each mercurial was very similar (11 up-regulated and 16  
402 down-regulated for HgCl<sub>2</sub>; 9 up-regulated and 18 down-regulated for PMA). But there  
403 were repair genes unique to each compound: *xthA*, *uvrAB*, *mutM*, and *recN* were only  
404 up-regulated by HgCl<sub>2</sub>; and *mutH* and *mutY* were only up-regulated by PMA.

405 The *recA*, *recN*, and *xthA* DNA repair genes were the most highly up-regulated  
406 (≥10 fold) in response only to HgCl<sub>2</sub>. The *recA* gene, induced by double-strand DNA  
407 breaks, serves multiple roles in DNA repair [41, 42]. Curiously, expression of *recBCD*,  
408 which is needed for break repair, either did not change or declined compared to  
409 unexposed cells for both mercurials. Expression of several genes involved in repair  
410 (*recG*, *nth*, *hdsS*, and *mcrC*) were down-regulated by both compounds, but with much  
411 larger negative fold-changes for PMA than HgCl<sub>2</sub>. Thus, the cells responded quickly to

412 both mercurials, but some distinct responses suggest these two compounds directly or  
413 indirectly yield different kinds of DNA damage.

414

415 *(b) Transcription*

416 Of the core RNA polymerase (RNAP) genes only PMA-exposure increased  
417 expression of a single gene *rpoZ* ( $\omega$  subunit), but expression decreased in the  
418 remaining *rpoABC* core genes (Table S10). HgCl<sub>2</sub> exposure did not change expression  
419 of any RNAP core genes except for a transient 3-fold drop in *rpoA* at 30 min. Only one  
420 of the five termination factors, the Rho-directed anti-terminator, *rof*, increased and did  
421 so for both mercurials with PMA again provoking a greater response.

422 Genes for three sigma factors displayed increased expression upon exposure to  
423 either mercurial, with *rpoH* (heat shock sigma factor) and *rpoS* (stationary phase and  
424 stress response sigma factor) increasing more following PMA-exposure and *rpoD*  
425 (housekeeping sigma factor) only increasing after HgCl<sub>2</sub> exposure. The effects of HgCl<sub>2</sub>  
426 or PMA exposure on the regulation of genes within each regulon controlled by *E. coli*'s  
427 seven sigma factors are tabulated in Table S11. Many genes are modulated  
428 differentially by HgCl<sub>2</sub> or PMA-exposure, but no single sigma factor is uniquely  
429 responsible for increases or decreases in responses to these two compounds.

430 Many of the 203 transcriptional regulators annotated in the RegulonDB (Table 3)  
431 [43, 44] and the 1,723 genes they control were expressed differently with the two  
432 mercurials (Table S12). PMA provoked up-regulation of significantly more transcription  
433 factor genes at 10 and 30 min than HgCl<sub>2</sub> exposure, but slightly fewer down-regulated  
434 regulators (Table 3). Of all COG categories, transcription had the most up-regulated

435 genes for both mercurials (Figure 3 and Table S6). PMA up-regulated ~40% more  
436 transcription related genes at 10 min and ~80% more genes at 30 min than HgCl<sub>2</sub>. Six  
437 activators (*mhpR*, *glcC*, *gadX*, *soxS*, *mlrA*, *phoB*) and three repressors (*mcbR*, *iscR*,  
438 *betI*) were up at all times for HgCl<sub>2</sub>, but *gadX* was the only activator gene up-regulated  
439 at all times for both mercurials (Table S12). GadX is part of the RpoS regulon [45] and  
440 activates the acid resistance system and multidrug efflux [46, 47]. Details of  
441 transcription factors and their regulons are provided in Table S12.

442       Lastly, *E. coli* has 65 currently annotated (ASM584v2), small non-coding RNAs.  
443 Although our RNA purification and library preparation methods were not optimized for  
444 their enrichment, we observed differential expression for a number of them (Table S5,  
445 feature type “ncRNA”). ncRNAs up-regulated for both mercurials are involved in  
446 regulation of acid resistance (*gadY*), oxidative stress (*oxyS*), and multiple transporters  
447 (*gcvB* and *sgrS*). In contrast, adhesion and motility (*cyaR*), and anaerobic metabolism  
448 shift (*fnrS*) were down-regulated by both compounds.

449

#### 450 (c) Translation

451       Upon HgCl<sub>2</sub> exposure 83% and 74% of ribosomal proteins (r-proteins) were  
452 down-regulated at 10 and 30 min, respectively, versus only 4% and 41% for PMA at the  
453 corresponding times (Figures 5 and S9; data for all functional group heat maps are  
454 shown in Table S13 and Table S14). Transcription of r-proteins is repressed directly by  
455 binding of the nutritional stress-induced nucleotide ppGpp and DksA protein to RNAP  
456 [48]. The ppGpp synthase genes, *spoT* and *relA*, were down-regulated or unchanged,  
457 but expression of *dksA* was up-regulated for both HgCl<sub>2</sub> and PMA exposure. R-protein

458 expression can also be inhibited by excess r-proteins binding to and inhibiting  
459 translation of their own mRNAs [49, 50].

460 Translation initiation and elongation factors were largely unchanged, but  
461 expression of all three peptide chain release factor genes were down for PMA and the  
462 ribosome recycling factor (*frr*) was up only for PMA, consistent with interruption of  
463 translation. Eight tRNA-synthase genes declined with HgCl<sub>2</sub> but PMA caused only four  
464 tRNA-synthase genes to decline and two to increase in expression (Table S14). Both  
465 mercurials caused a relative decline in tRNA expression for most amino acids,  
466 especially arginine, lysine, methionine, tyrosine, and valine tRNAs. With very few  
467 exceptions ribosome assembly and translation were shut down for up to 30 min by both  
468 compounds but returned to normal levels by 60 min.

469

#### 470 (d) *Macromolecular turnover and chaperones*

471 Divalent inorganic mercury can stably crosslink proteins and their subdomains  
472 via cysteines, disrupting 3-dimensional structures and allosteric movements [51-53].  
473 Although monovalent PMA cannot cross-link, it forms a bulky adduct with cysteines  
474 (LaVoie, 2015), which may compromise protein folding. The proteases and chaperones  
475 of the heat shock response degrade or repair misfolded proteins [54] and we found their  
476 expression was increased by both mercurials (Figures 6 and S12 and Table S13). At 10  
477 min, expression of protease genes *lon*, *clpXP* and *ftsH* had risen 4- to 6-fold with HgCl<sub>2</sub>  
478 and *lon* and *clpXP* were up 3-fold with PMA. HgCl<sub>2</sub> provoked up-regulation of all 12 heat  
479 shock protein (HSP) and chaperone genes by 10 min, but only chaperones *clpB* and  
480 *ybbN* mRNAs remained elevated at 30 min. Two other HSP genes, Hsp15 (*hslR*)

481 involved in stalled ribosome recycling and Hsp31 (*hchA*) an amino acid deglycase, were  
482 further up-regulated by HgCl<sub>2</sub> at 60 min. In contrast, at 10 min PMA had up-regulated  
483 only five HSPs, increasing to six by 30 min and declining to three by 60 min. The *ibpA*  
484 and *ibpB* chaperone genes were among the most highly up-regulated genes for both  
485 HgCl<sub>2</sub> and PMA and persisted throughout recovery.

486         Of the 16 RNases and RNA processing enzymes only 3 increased: RNase R (3-  
487 fold for HgCl<sub>2</sub> and 5-fold for PMA) for both compounds during first 30 min; RNase III  
488 two-fold for PMA at 30 min; and RNase T two-fold for HgCl<sub>2</sub> at 60 min. The  
489 degradasome complex subunit genes (*rne*, *eno*, *rhIB*, *pnp*, *ppk*) [55] were all down-  
490 regulated for PMA during the first 30 min following exposure, except the helicase (*rhIB*),  
491 but only enolase was down-regulated for HgCl<sub>2</sub> (Figures 6 and S12 and Table S13).  
492 Expression of RNase II (*rnb*) was also down-regulated for both compounds, but with  
493 greater fold-changes observed for PMA. It is unclear what effect these changes in gene  
494 expression could have on RNA turnover and message decay rates while under mercury  
495 stress. As with the DNA metabolism genes, expression of the transcriptional apparatus  
496 shows that sufficient PMA was taken up to elicit both positive and negative responses  
497 distinct from HgCl<sub>2</sub>.

498

## 499 ii. ENERGY PRODUCTION

### 500 (a) *Electron transport chain*

501         Expression of approximately 50% of all electron transport chain (ETC) genes was  
502 down-regulated during the first 30 min for HgCl<sub>2</sub> and PMA, with individual gene  
503 responses being very similar for both compounds (Figures 7 and S13 and Table S13).

504 By 60 min, only 26% of these genes were down-regulated for HgCl<sub>2</sub>, and none were  
505 down-regulated for PMA. Expression of NADH:ubiquinone oxidoreductase genes was  
506 down-regulated by both compounds, with 77% and 100% of these genes being down-  
507 regulated at 10 and 30 min, respectively. The ATP-synthase subunit genes were also  
508 strongly down-regulated by both mercurials at 10 and 30 min, but normal expression  
509 was restored at 60 min.

510 The *torCAD* locus that encodes the trimethylamine N-oxide anaerobic respiratory  
511 system was strongly up-regulated only by PMA exposure. This is likely an artifact of the  
512 dimethyl sulfoxide used to dissolve PMA, although the final DMSO concentration,  
513 0.015% vol/vol (2.1 mM), was not expected to have any biological effect [56] and the  
514 anaerobic DMSO reductase genes (*dmsABC*) were down-regulated. It is unlikely that  
515 either the *tor* or *dms* responses significantly affect growth rate [57] or afford protection  
516 against either mercurial since over-expressed heme-dependent *torC* may be in the  
517 apoprotein form [58].

518

#### 519 (b) Carbon metabolism

520 Expression of genes for carbon metabolism decreased generally, but there were  
521 more up-regulated genes in response to HgCl<sub>2</sub> and not all steps were affected equally  
522 by both mercurials (Figure S14). Expression of five genes of the pentose-phosphate  
523 pathway rose in at least one time point for HgCl<sub>2</sub>, but only *pgl* increased for PMA at 10  
524 min. The ribose-5-phosphate isomerase gene (*rpiB*), which is a backup enzyme for the  
525 gene product of *rpiA* [59], was up-regulated 40-fold for HgCl<sub>2</sub> at 10 min; although  
526 expression of *rpiA* did not differ from the unexposed cells for either mercurial at any

527 time. Glycolysis responded similarly to both mercurials, with the greatest number of  
528 these genes being down-regulated at 30 min. The expression changes in TCA cycle  
529 genes were distinct for HgCl<sub>2</sub> and PMA; six genes were up-regulated in at least one  
530 time point for HgCl<sub>2</sub> and only one was up-regulated for PMA. Expression of several  
531 carbohydrate transport genes was down-regulated by both mercurials (Table S6).

532

### 533 (c) Nicotinamide adenine dinucleotide (NAD)

534 Expression of genes for nicotinamide adenine dinucleotide (NAD) and NAD-  
535 phosphate (NADP) synthesis and turnover pathways was repressed by mercury  
536 exposure (Figure S15). The biosynthesis genes were moderately down-regulated, with  
537 *nadB* being the only gene down for both mercurials at all times and *nadA* decreasing for  
538 HgCl<sub>2</sub> at 30 and 60 min and for PMA at 30 min. Expression of the *pncABC* salvage  
539 pathway did not change. The NAD reduction pathways were more affected than the  
540 NADP reduction pathways, with only *pgi* down for both mercurials and *edd* down only  
541 for HgCl<sub>2</sub>. The transhydrogenase (*pntAB*) was down only for PMA at 10 and 30 min.  
542 Expression of other genes for NAD to NADH reduction in glycolysis and the TCA cycle  
543 were also down for both mercurials, which reflects the overall decrease in metabolism  
544 and energy production pathways.

545 Globally, redox metabolism declined immediately after exposure and normal  
546 gene expression levels were not restored until growth recovered to the pre-exposure  
547 rate. KEGG maps created using iPath [60] depict system-wide metabolism changes  
548 over time (Figures S16-S18 for HgCl<sub>2</sub> and Figures S19-S21 for PMA).

549



550 iii. CENTRAL METABOLISM

551 (a) *Amino acid metabolism and transport*

552 The two mercurials had distinct effects on expression of genes for biosynthesis of  
553 amino acids (Figure 8 and S22). Since mercury targets cysteine thiol groups and will  
554 deplete the cellular reduced thiol pool, we expected an increase in cysteine and  
555 glutathione biosynthesis. Surprisingly, most genes for biosynthesis of these biothiols  
556 and for general sulfur metabolism were down-regulated or no different from the  
557 unexposed cells, with the exception of up-regulation of *cysE*, which is the first step in  
558 the biosynthesis pathway from serine.

559 Methionine biosynthesis gene expression increased for 7 genes with  $\text{HgCl}_2$ , but  
560 11 genes were down-regulated with PMA, especially *metE* dropping 187-fold with PMA  
561 at 30 min (Figure 8 and S22). Expression of genes for histidine synthesis also  
562 responded differently to each mercurial, rising dramatically with  $\text{HgCl}_2$  at 30 to 60 min.  
563 In contrast, all *his* genes expression dropped with PMA from 10 to 30 min. Genes for  
564 the synthesis of leucine, isoleucine, and valine had the opposite response, with most  
565 going down with  $\text{HgCl}_2$  but increasing with PMA. Expression of other amino acid  
566 biosynthetic pathways was largely unchanged or declined with both mercurials.  
567 Branched-chain (*livKHMGF*), dipeptide (*dppABCDF*), and oligopeptide (*oppABCDF*)  
568 transporters were also down for both mercurials, with greater negative fold-changes for  
569 PMA (Table S5).

570

571 (b) *Inorganic ion transport and metallochaperones*

572 Inorganic Hg(II) can displace beneficial thiophilic metals from their native binding  
573 sites in proteins, potentially affecting transport and disrupting transition metal  
574 homeostasis [23], leading to expression changes for non-ferrous metal cation and  
575 oxoanion transporters (Figures 9 and S23 and Table S13), iron homeostasis (Figures  
576 10 and S24 and Table S13) and metal-binding proteins and enzymes (Table S15).

577 Inorganic mercury exposure releases labile iron, which could itself increase  
578 oxidative stress via Fenton chemistry under aerobic growth [23, 61]. Most iron uptake  
579 pathways declined early for both mercurials, consistent with the observed increase in  
580 expression of the Fur repressor. The cytochrome *c* maturation genes that transport  
581 heme to the periplasm (*ccmABCDE*) were also down for both mercurials. The putative  
582 ferrous iron and zinc efflux pump, *fieF* [62] increased 2-fold for HgCl<sub>2</sub> at 10 min only,  
583 suggesting it may have a brief role in restoring one or both of these homeostases.

584 There are two iron-sulfur (Fe-S) cluster assembly pathways in *E. coli* [63, 64].  
585 Expression of the primary Isc system (*iscRSUA*, *hscBA*, and *fdx*) increased strongly for  
586 both mercurials, but with greater changes for HgCl<sub>2</sub> (Figures 10 and S24 and Table  
587 S13). The secondary Fe-S cluster assembly system *sufABCDSE*, which activates under  
588 oxidative stress or iron limiting conditions also increased greatly, but only for HgCl<sub>2</sub>.  
589 These transcriptional responses confirm and extend biochemical findings [23] that Fe-S  
590 clusters are more vulnerable to inorganic mercury than to organomercurials and the cell  
591 quickly tries to repair this damage.

592 Zinc uptake via expression of *zupT* increased modestly from 3 to 5-fold for both  
593 mercurials during the first 30 minutes (Figures 9 and S23 and Table S13). In contrast,  
594 expression of the P-type ATPase zinc efflux pump, *zntA* [65], increased 20- to 40-fold

595 for both mercurials at 10 and 30 min and the periplasmic binding protein ZraP was up  
596 throughout recovery. *E. coli* has two copper/silver efflux systems, Cue and Cus [66].  
597 Surprisingly, the Cus system genes (*cusRS*, *cusCFBA*) primarily used under anaerobic  
598 conditions were among the most down-regulated genes under PMA exposure. The Cue  
599 system consists of the multi-copper oxidase, CueO, and a P-type ATPase, CopA, both  
600 regulated by the MerR homolog, CueR. Both *cueO* and *copA* were up over 20-fold with  
601 HgCl<sub>2</sub> at 10 and 30 min, but only 5-fold with PMA briefly at 10 min. The nickel uptake  
602 system [67] (*nikABCDER*) was also very strongly down-regulated under PMA exposure  
603 conditions through all times although expression of repressor NikR was unchanged,  
604 except for a 3-fold increase with HgCl<sub>2</sub> at 10 min. Expression of the nickel and cobalt  
605 efflux gene, *rcnA*, increased with HgCl<sub>2</sub> or PMA. Manganese (*mntH*), and magnesium  
606 (*mgtA*, *corA*) uptake genes increased with both mercurials.

607 Inorganic anions used by *E. coli* include phosphate, sulfate, and molybdate and  
608 genes for defense against arsenate, a phosphate mimic (Figures 9 and S23 and Table  
609 S13). Expression of the ABC phosphate transport system (*pstSCAB*) genes increased  
610 greatly for both mercurials, with PMA-provoked changes up to 165-fold for the  
611 phosphate binding protein, *pstS*. The two-component phosphate regulatory system,  
612 PhoBR increased 22-fold with HgCl<sub>2</sub> and 105-fold with PMA for *phoB*. Sulfate and  
613 thiosulfate uptake by the ABC transporter (*cysPUWA*) decreased strongly with HgCl<sub>2</sub> at  
614 30 min and PMA at 10 and 30 min. Expression of molybdate uptake (*modABC*)  
615 increased with PMA during the first 30 min but only at 10 min with HgCl<sub>2</sub>. The arsenate  
616 resistance operon cannot effect Hg(II) resistance, but was highly induced by both

617 mercurials, perhaps through interacting with the three-cysteine metal-binding site of the  
618 ArsR repressor [68].

619

#### 620 iv. SURFACE FUNCTIONS

##### 621 (a) Cell wall biogenesis, porins, lps, efflux systems, and electrolyte balance

622 The transcriptional response of peptidoglycan, membrane biosynthesis, and cell  
623 division genes was similar for both mercurials (Figure S25 and Table S13). Expression  
624 increased for roughly 20% of lipid biosynthesis genes, including those for cardiolipin,  
625 and expression decreased for 20-30% of other lipid-related genes. Transcription of  
626 genes for murein synthesis (*murCDEFGIJ*) in particular declined for both mercurials  
627 during the first 30 min.

628 *E. coli* encodes several antibiotic resistance efflux systems that are up-regulated  
629 by mercury exposure (Figures 11 and S26 and Table S13). The multiple antibiotic  
630 resistance locus (*marRAB*), which increases drug efflux and also limits passive uptake  
631 by decreasing porin expression [69], was strongly up-regulated by both mercurials with  
632 greater changes observed for PMA. Though expression of some porin genes (*ompC*,  
633 *ompF*, *ompT*, *ompW*) was repressed, three non-specific porins (*ompG*, *ompL*, *ompN*)  
634 were up-regulated only by PMA. Genes from several TolC-dependent antibiotic efflux  
635 systems were up-regulated by both mercurials as well, including *acrEF*, *emrD*, *emrKY*,  
636 and several *mdt* genes [70]. HgCl<sub>2</sub> exposure alone also up-regulated two-component  
637 sensor genes (*phoQP* at 10 min and *basSR* at 60 min) that regulate genes involved in  
638 modification of the cell surface and increase polymyxin resistance [71], but most of  
639 these genes were down-regulated or unchanged for PMA.

640           The response to osmotic stress and maintenance of electrolyte balance are  
641 important membrane functions requiring adaptation in dynamic natural environments.  
642 During HgCl<sub>2</sub> exposure the expression of the sodium antiporter, NhaA, increased 4-fold  
643 at 10 min and the calcium/potassium antiporter, ChaA, was up 3-fold at 10 and 30 min  
644 (Figures 9 and S23 and Table S13). In contrast, expression of genes for transport of the  
645 major electrolyte, potassium, changed only modestly in some subunits of the *kdp*, *kef*,  
646 and *trk* systems, without an obvious response pattern. However, transcription of genes  
647 for defense against osmotic stress was uniformly up-regulated; betaine genes (*betABIT*  
648 and *proP*), *osmBCEFY*, and mechanosensitive channel proteins (*mscL* and *mscS*)  
649 increased for both mercurials, as did a putative osmoprotectant ABC permease  
650 (*yehYXW*) [72] only with HgCl<sub>2</sub> at 30 and 60 min (Table S5).

651

652 *(b) Motility and biofilm*

653           Nearly all flagellar component genes were strongly down-regulated for both  
654 mercurials, with negative changes being much greater for PMA than for HgCl<sub>2</sub> exposure  
655 (Figures 12 and S27). Only PMA increased expression of fimbriae and curli fiber genes,  
656 which alter motility and increase adhesion (Figure 13 and S28) [73]. Fifteen genes up-  
657 regulated by PMA exposure were annotated as homologs of FimA, but with unknown  
658 function. FimA is the major structural component of fimbriae, but these genes may serve  
659 other functions. Motility genes whose expression dropped remained low until 60 min,  
660 indicating that the structurally and energetically intensive motility systems are very slow  
661 to recover.

662 HgCl<sub>2</sub> and PMA also provoked expression of several biofilm-related genes  
663 (Figures 13 and S28 and Table S13). The *bhsA* and *bdcA* loci were among the most  
664 highly up-regulated genes during HgCl<sub>2</sub> exposure, with much higher fold-changes than  
665 observed for PMA (Tables 2 and 3). Neither gene is well characterized, but  
666 independently each has been found to decrease biofilm formation and increase  
667 resistance to external stressors [74, 75]. Only PMA increased expression of genes for  
668 poly-β-1,6-N-acetyl-glucosamine (PGA) polysaccharide production [76] and biofilm  
669 related genes, *ycgZ*, *ymgA*, *ariA*, *ymgC* [77]. Thus, PMA elicits a broader response that  
670 potentially alters the cell surface and may increase adhesion and biofilm formation; in  
671 contrast HgCl<sub>2</sub> only inhibits motility and does not activate adhesion pathways. It is  
672 possible that some changes observed for motility and biofilm related genes following  
673 PMA-exposure are an artifact of the DMSO, but other studies suggest that solvent  
674 would have no effect or that much higher concentrations than used here would be  
675 required to induce these changes [56, 78].

676

## 677 v. STRESS RESPONSES

### 678 (a) *Oxidative stress response and repair*

679 There are two oxidative stress response pathways in *E. coli*, the *oxyRS* and  
680 *soxRS* regulons [61, 79]. OxyR, a LysR-family transcriptional regulator, uses a cysteine-  
681 pair to sense oxidative damage and regulates 49 genes when oxidized [80]. HgCl<sub>2</sub>  
682 exposure increased expression of 22 OxyR regulon genes at 10 min; these then  
683 declined to 13 genes by 60 min (Table S16). In contrast, PMA provoked expression of  
684 16 OxyR regulon genes at 10 and 30 min, but none at 60 min. OxyS, a small non-

685 coding RNA regulated by OxyR, represses *rpoS*, *fhlACD* and other genes to prevent  
686 redundant induction of stress response genes [81]. The *oxyS* gene was among the most  
687 highly expressed genes with over a 1,000 fold-change with HgCl<sub>2</sub> at 10 and 30 min, and  
688 a more modest change of 10-fold at 10 min and 6 fold at 30 min with PMA.

689 The SoxRS regulon is the other oxidative stress response system in *E. coli*.  
690 SoxR, a MerR-family repressor-activator, uses the oxidation state of 2Fe-2S clusters to  
691 respond to superoxide (O<sub>2</sub><sup>-</sup>) stress and induce transcription of SoxS [82-85], which then  
692 transcriptionally regulates 53 genes [79, 86] (Table S16). HgCl<sub>2</sub> or PMA exposure up-  
693 regulated 22 or 25 genes, respectively, at 10 min and these had declined to 13 or 0  
694 genes, respectively by 60 min.

695 Key genes in these oxidative stress regulons differentially expressed upon  
696 mercury exposure include the ROS scavengers: catalase (*katG*), alkyl hydroperoxide  
697 reductase (*ahpCF*), and superoxide dismutase (*sodA*) (Figures 14 and S29 and Table  
698 S13). Thiol homeostasis genes included *gor*, *grxA*, and *trxC* (Figures 14 and S29 and  
699 Table S13). Iron homeostasis and the Fe-S cluster assembly and repair genes (*fur*, *dps*,  
700 *fldA*, *fpr*, *hemH*, *sufABCDE*, and *yggX*) were also up-regulated. PMA provoked  
701 comparatively lower fold-changes than HgCl<sub>2</sub> for *grxA*, *trxC*, *ahpC*, *dps*, *fldA*, *hemH*, and  
702 *yggx*. The manganese uptake protein, *mntH*, plays an important role in ROS resistance  
703 [87] and was up for both mercurials. Oxidation-resistant dehydratase isozymes, *acnA*  
704 and *fumC* [88, 89] also increased, but only for HgCl<sub>2</sub> exposure. Thus, both mercurials  
705 triggered the Oxy and Sox oxidative stress responses, but HgCl<sub>2</sub> elicited greater fold-  
706 changes overall than PMA compared to unexposed cells.

707           Because mercury poisons the cellular thiol pool [23], we expected that regulation  
708 of redox homeostasis proteins such as glutaredoxins, thioredoxins and glutathione-  
709 related genes would respond to mercury exposure (Figure 14 and S29). Glutaredoxin 1  
710 (*grxA*) expression was up for both mercurials with a greater fold-change for HgCl<sub>2</sub>, but  
711 glutaredoxin 2 (*grxB*) was down for both mercurials, while glutaredoxin 3 (*grxC*) and  
712 glutaredoxin 4 (*grxD*) were up only for PMA. Thioredoxin reductase (*trxB*) increased  
713 two-fold with PMA (30 min only), but was up with HgCl<sub>2</sub> 8-fold (10 min) and 4-fold (30  
714 min). Thioredoxin 1 (*trxA*) expression increased two-fold only with PMA (10 min), in  
715 contrast to thioredoxin 2 (*trxC*), which was up for both mercurials, but much higher with  
716 HgCl<sub>2</sub> than with PMA. However, the thiol peroxidase (*tpx*) was up modestly for PMA, but  
717 did not change for HgCl<sub>2</sub>. Thus, while each mercurial stresses the cell to maintain redox  
718 homeostasis, a greater burden is created by HgCl<sub>2</sub> exposure.

719           Glutathione (GSH) serves as the cell's redox buffer and as a scavenger of  
720 mercurials (Figures 14 and S29 and Table S13). Surprisingly, expression of GSH  
721 biosynthesis and utilization genes increased only modestly. The  $\gamma$ -  
722 glutamyltranspeptidase (*ggt*) increased late (60 min) by 4-fold only with HgCl<sub>2</sub>. GSH  
723 synthase (*gshA*) did not change and *gshB* was up 2-3 fold for both mercurials only at 10  
724 min. The GSH importer (*gsiABCD*) may be a salvage pathway to recover GSH and  
725 cysteine leaked into the periplasm by CydCD [90, 91], but it was down-regulated by  
726 HgCl<sub>2</sub> or PMA through 30 min. The GSH reductase (*gor*) increased only with HgCl<sub>2</sub> at  
727 10 min and several GSH S-transferase genes involved in detoxification [92] (*gstA*, *gstB*,  
728 *yfcF*, *yqjG*, *yibF*, *yncG*) increased with both mercurials. Since all of these proteins have  
729 Hg(II)-vulnerable cysteines in their active sites, it is surprising that neither Hg(II) nor



730 PMA-challenged cells provoked increased expression and suggests that their normal  
731 mRNA levels are sufficient to replenish them.

732

733 *(b). Genes with delayed up-regulation*

734 Genes unchanged at 10 min but differentially expressed at both 30 and 60 min or  
735 60 min alone may be those needed as cells transition out of stasis and towards normal  
736 growth (Table S17). For HgCl<sub>2</sub> exposure, 95 genes were up-regulated and 140 genes  
737 were down-regulated that display this delayed response pattern. Approximately half of  
738 the up-regulated genes are involved in energy production, transport and metabolism  
739 pathways based on COG annotations. Roughly 45% of these delayed HgCl<sub>2</sub> provoked,  
740 up-regulated genes are the same as genes that were differentially expressed during the  
741 first 30 min of PMA exposure. This overlap is consistent with slower recovery of growth  
742 in HgCl<sub>2</sub> exposed cells and that some of the same pathways are used for recovery by  
743 both compounds. In contrast, for the more quickly recovering PMA exposure, of the  
744 genes that showed no change at 10 min only six were up-regulated at 60 min (Table  
745 S17). Only two of these delayed-response genes for PMA exposure overlapped with up-  
746 regulated genes for HgCl<sub>2</sub> exposure.

747

## 748 **DISCUSSION**

749 Mercury is a ubiquitous toxicant that serves no biologically beneficial role.  
750 Exposure to any form of mercury negatively impacts the health of organisms from  
751 microbes to humans. The biological effects of different forms of mercury are often  
752 conflated and methylmercury is assumed to be the most toxic form. However, the

753 systemic biochemical and molecular differences between inorganic and organic mercury  
754 compounds have yet to be well characterized from exposure through recovery in a  
755 single model system.

756

## 757 ***BULK DIFFERENTIAL EFFECTS ON GROWTH AND GENE EXPRESSION***

758 The sub-acute mercury exposure conditions used in this study were chosen by  
759 identifying a mercury concentration high enough to stop cells from doubling, but low  
760 enough to allow restoration of the pre-exposure growth rate within one-hour (~1  
761 generation period) after exposure (Figure 1a). Concentrations below 3  $\mu\text{M}$  of either  
762 compound did not consistently inhibit growth and higher concentrations of  $\text{HgCl}_2$  did not  
763 allow recovery within the desired time frame. Three micromolar Hg is well within the  
764 range that bacteria can experience chronically from dental amalgam fillings [93] and in  
765 highly contaminated environments, such as artisanal gold mining operations [8].  
766 Mercury in tuna is 0.386 ppm compared to the proxy organomercurial, PMA, used here  
767 at 3  $\mu\text{M}$  or 0.6 ppm [94].

768 PMA-exposed cells recovered exponential growth faster (Figure 1) than those  
769 with equimolar exposure to  $\text{HgCl}_2$ , perhaps owing to lower uptake of PMA (Table S2).  
770 However, PMA-exposed cells differentially expressed more genes than  $\text{HgCl}_2$  exposed  
771 cells during the first 30 min of exposure (Figure 1b). These results agree with  
772 observations in *C. elegans*, where MeHg exposure resulted in four times more DEGs  
773 than did  $\text{HgCl}_2$  for all concentrations tested [95]. However, in contrast to *E. coli*, whose  
774 growth was inhibited more by inorganic  $\text{HgCl}_2$ , in *C. elegans* the effective toxic  
775 concentration of methylmercuric chloride was lower than for  $\text{HgCl}_2$  [95].

776 We found that most DEGs peaked at 10 min after exposure for both compounds  
777 with HgCl<sub>2</sub> provoking more down-regulation and PMA yielding more up-regulated genes  
778 throughout the exposure period (Figure 1b). Even though the optical density (OD) of the  
779 HgCl<sub>2</sub> exposed culture showed no growth recovery from 10 min to 30 min, DEGs  
780 decreased by 22%, while PMA-exposed cells over the same period had a moderate  
781 increase in OD, but only an 8% decrease in DEGs (Figure 1). In contrast in a eukaryotic  
782 system, the livers of HgCl<sub>2</sub> exposed zebrafish continuously increased in DEGs  
783 throughout the observed 96 hour exposure period as mercury accumulated in their cells  
784 [96].

785 In *E. coli*, during the first 30 min post-exposure, 50-70% of both up- and down-  
786 regulated genes were the same for both compounds (Figure 2), but at the level of  
787 individual genes there were both qualitative and quantitative differences in expression  
788 (Table S5), consistent with idiosyncratic transcriptional responses to each compound.  
789 The nematode *C. elegans* also manifested distinct and even some opposite  
790 transcriptional responses to inorganic and organic mercury exposure in a single end-  
791 point microarray experiment [24].

792 As there are not yet other studies of the transcriptional response of a bacterium  
793 to mercury exposure, on the basis of the findings in eukaryotes and our proteomic work  
794 [23] we have organized our observations here into those we had expected and those we  
795 did not expect from any yet published work.

796

## 797 **EXPECTED AND UNEXPECTED GENE-SPECIFIC CHANGES**

798 *Expected transcriptional changes:*

799 (a) Thiol homeostasis. The millimolar cytosolic pool of glutathione (GSH) can sequester  
800 mercurials and thereby protect protein thiols from binding strongly to these soft metal  
801 toxicants. However, if the GSH pool becomes depleted by mercury complexation, the  
802 cell loses this primary defense mechanism. Since proteins of the stress response and  
803 repair pathways all contain active site thiols, often as part of Hg(II)-vulnerable Fe-S  
804 centers, it is not obvious how a cell that has lost much of its available thiols to Hg(II)  
805 chelation can restore its metabolism. Given this, we expected cysteine and glutathione  
806 biosynthesis pathways to be up-regulated. However, cysteine biosynthesis was down  
807 (Figures 8 and S22 and Table S13) and GSH biosynthesis was mostly unchanged  
808 (Figures 14 and S29 and Table S13) for both compounds, in contrast to the eukaryotic  
809 response to mercury [96-98] and H<sub>2</sub>O<sub>2</sub> exposure [99], which increase GSH and  
810 metallothionein production. However, although thiol biosynthesis did not increase,  
811 genes involved in maintaining cellular thiol homeostasis did increase (Figures 14 and  
812 S29 and Table S13); thioredoxin (*trxC*) and glutaredoxin (*grxA*) were among the most  
813 highly up-regulated genes with HgCl<sub>2</sub> and PMA exposure. Others have also found in *E.*  
814 *coli* that glutathione reductase increased with HgCl<sub>2</sub> and both compounds increased  
815 expression of glutathione oxidoreductase and S-transferase genes, which protect  
816 against oxidative stress and xenobiotics [100].

817

818 (b) Iron homeostasis. We also expected inorganic mercury to disrupt iron-sulfur clusters  
819 with consequent effects on Fe homeostasis generally [23, 101]. Iron uptake was down-  
820 regulated with both mercurials, consistent with excess intracellular free Fe(II) and  
821 general oxidative stress, but expression of the uptake repressor (*fur*) was only up for

822 HgCl<sub>2</sub> (Figure 10 and S24). *Fur* expression is activated by either OxyR or SoxS [99,  
823 102] and Fur represses Fe uptake pathways with ferrous iron as a co-repressor [103].  
824 Fur can also bind other divalent metals [104], so Hg(II)-Fur might mimic Fe-Fur as an  
825 iron uptake repressor under these conditions to limit Fenton-mediated damage from  
826 excess iron. Although both mercurials increased expression of the primary Fe-S cluster  
827 assembly and repair system (*isc*), only HgCl<sub>2</sub> induced the secondary system (*suf*),  
828 which is normally induced under oxidative stress or iron limiting conditions [63, 105]  
829 (Figures 10 and S24 and Table S13). Also, only HgCl<sub>2</sub> exposure increased expression  
830 of iron storage proteins: ferritin, bacterioferritin, and Dps (Figure 10 and S24). The DNA  
831 binding protein Dps which binds free iron to protect DNA from ROS damage [106] was  
832 one of the most highly up-regulated genes with HgCl<sub>2</sub> exposure (Table 1).

833  
834 (c) Oxidative stress response. The known close link between iron homeostasis and  
835 oxidative stress [61] explains the high fold-changes upon HgCl<sub>2</sub> exposure in genes that  
836 respond to oxidative stress (Table S16) and echoes mercury's long known stimulation of  
837 oxidative damage in rat kidney mitochondria [107]. The small non-coding RNA *oxyS*  
838 was the second most highly up-regulated gene upon HgCl<sub>2</sub> exposure with differential  
839 expression more than 100-fold greater than observed for PMA (Table 1). The ROS  
840 scavenger *ahpF* was also highly up-regulated, along with *katG* (early) and *sodA*  
841 (delayed) but only for HgCl<sub>2</sub> (Figures 14 and S29 and Table S16). Other ROS resistant  
842 enzymes, aconitase A [89] and fumarase C [108] (Table S16) also increased only for  
843 HgCl<sub>2</sub>, as did the manganese-dependent alternative ribonucleotide reductase genes  
844 (*nrdHIEF*) [109]. The glutaredoxin-like protein that functions like thioredoxin, *nrdH* [110],

845 was highly up-regulated by HgCl<sub>2</sub> and might support other thioredoxin and glutaredoxin  
846 proteins. These striking differences in gene expression illuminate how *E. coli* modulates  
847 expression of specific genes not only to deal with compromised function of specific  
848 HgCl<sub>2</sub> modified proteins, but also to manage the consequent cascade of reactive oxygen  
849 species.

850

851 (d) Heat shock response. Mercurials bound to protein cysteines could disrupt protein  
852 folding, subunit assembly, and allosteric movements [52, 111] and inorganic mercury  
853 can crosslink neighboring cysteines leading to aggregation [51]. Increased expression  
854 of heat shock response genes was expected as a consequence of such anticipated  
855 protein misfolding problems [112]. Indeed, expression of heat shock chaperonins and  
856 protease genes increased for both mercurials, with more genes up early in response to  
857 HgCl<sub>2</sub> than to PMA (Figures 6 and S12 and Table S13). Genes for the small chaperone-  
858 like proteins, *ibpA* and *ibpB*, were among the most highly increased for both  
859 compounds, especially for HgCl<sub>2</sub> (Table 1), consistent with their role in aiding Lon  
860 protease in the degradation of misfolded proteins [113-115].

861

862 (e) Translational apparatus. Thiophilic Cd<sup>2+</sup> exposure in *E. coli* has been shown to  
863 decrease expression of ribosomal proteins [116]. In our proteomics work (Zink et al. in  
864 preparation) we observed fourteen r-proteins (7 for each ribosomal subunit) that formed  
865 stable adducts with either PMA or Hg(II), so it was reasonable to expect this to be  
866 reflected in transcription of r-proteins. Indeed, HgCl<sub>2</sub> exposure repressed expression of  
867 up to 83% of r-protein genes at 10 min and 74% at 30 min (Figure 5, S11, and Table

868 S14), whereas PMA only briefly repressed expression of 41% of r-proteins at 30 min.  
869 Divalent inorganic mercury's ability to cross-link proteins may interfere with ribosome  
870 assembly resulting in translational feedback and repression of r-proteins transcription.  
871 Disruption of ribosome assembly could also contribute to the slower recovery of growth  
872 after inorganic Hg(II) exposure.

873  
874 (f) Energy production. The dependence of most energy production pathways on redox-  
875 active transition metals and redox-active sulfur compounds made them obvious targets  
876 of mercurial disruption, e.g. three ATP-synthase subunits form stable adducts after in  
877 vivo exposure to Hg(II) or PMA (Zink et al. in preparation). Intriguingly, expression of  
878 genes within this functional category was largely down-regulated early in exposure, with  
879 all nine ATPase subunits down for HgCl<sub>2</sub> (10 min) and eight down for PMA (30 min)  
880 (Figure 7 and S13). Although others have found that Cd exposure in *E. coli* repressed  
881 aerobic energy metabolism genes and induced anaerobic pathways [116], we found that  
882 both aerobic and anaerobic energy metabolism were repressed by HgCl<sub>2</sub> and PMA.  
883 Even though expression of the oxygen-sensing *fnr* [117] and *aer* [118, 119] activators of  
884 the anaerobic shift were moderately up for PMA and unchanged for HgCl<sub>2</sub> (Table S5).  
885 Similarly, glucose metabolism genes were also predominantly down during early  
886 periods for both compounds, especially with PMA exposure (Figure S14). Thus, with  
887 severely compromised energy production systems, it is not surprising that amino acid,  
888 carbohydrate and nucleotide metabolism genes, and the energy-dependent transport of  
889 these molecules (Figure 3 and Table S6), are also largely depressed initially.

890

891 (g) Homeostases of non-ferrous metals. We expected mercurials to disrupt electrolyte  
892 balance [23], but expression of the potassium efflux pumps' subunit genes (*kcpABC*,  
893 *kefBC*, and *trkAGH*) were not uniformly up-regulated, although the need to restore the  
894 pH balance was indicated by briefly increased expression of the H<sup>+</sup>/Na<sup>+</sup> antiporter  
895 (*nhaA*) for both compounds (Figures 9, S23 and Table S5). It may be that normal levels  
896 of the proteins involved in maintaining cellular electrolyte balance are sufficient to  
897 respond to mercury exposure and a significant change in transcriptional expression is  
898 not required for these genes.

899 Mercury is also expected to disrupt non-ferrous metal homeostasis because it  
900 can displace other metals, such as zinc and copper, as enzyme cofactors [120, 121].  
901 Expression of metal uptake genes decreased and of metal efflux genes increased for  
902 zinc, copper, nickel and cobalt, with generally greater fold-changes for HgCl<sub>2</sub>. Zinc efflux  
903 by ZntA is regulated by the MerR homolog ZntR, which can respond to Hg(II) [122], but  
904 has not been shown to confer resistance to Hg(II) exposure. Indeed, *in vitro* the ATPase  
905 activity of the ZntA efflux pump is stimulated by Hg-thiolate complexes [65, 123]. This  
906 could be a possible source for the decline in inorganic Hg content observed over time  
907 (Table S2) once bound by glutathione or cysteine, but would not explain the increase at  
908 60 min or decline in PMA, unless other efflux systems such as antibiotic resistance  
909 systems are effective as well. Manganese may protect iron metalloenzymes under  
910 oxidative stress conditions [87] and Mn uptake by *mntH*, as part of the OxyR regulon,  
911 was correspondingly up-regulated for both compounds in response to mercury-induced  
912 oxidative stress.

913



914 *Unexpected transcriptional changes:*

915 (a) Motility and chemotaxis. Energetically costly flagellar motility and chemotaxis were  
916 strongly down-regulated by both mercurials and were among the slowest to recover  
917 normal transcription levels (Figures 12 and S27 and Table S13). Motility gene  
918 expression is regulated by  $\sigma^{28}$  (*fliA*) and FlhDC [124] and the expression of these two  
919 regulatory genes declined with HgCl<sub>2</sub> but was unchanged with PMA. Repression of  
920 motility may occur through sigma factor competition for binding to RNAP between  $\sigma^{28}$   
921 and increased expression of  $\sigma^S$  [125] and/or through repression of the flagellar  
922 transcriptional activator FlhDC by increased expression of the small ncRNAs *oxyS* and  
923 *gadY* [126]. Interestingly, HgCl<sub>2</sub> exposure impaired locomotion in *C. elegans* [24],  
924 although through a very different mechanism of motility from *E. coli*.

925

926 (b) Surface appendages and biofilm synthesis. Surprisingly, there were large increases  
927 in expression of genes involved in biofilm formation and adhesion or dispersal (Figures  
928 13 and S28 and Tables S13). Expression of *bhsA* and *bdcA*, which function in biofilm  
929 dispersal or reduced biofilm formation [74, 75], were the first and third, respectively,  
930 most up-regulated genes by HgCl<sub>2</sub> (Table 1) and were also up for PMA, but with much  
931 lower fold-changes (Table 2). Expression of *bhsA* is also up-regulated by other diverse  
932 stressors and may decrease cell permeability [75, 127]. PMA exposure especially  
933 increased expression of genes for the polysaccharide PGA, which aids in adhesion in  
934 biofilm formation [76], and other biofilm formation (*ycgZ*, *ymgA*, *ariA*, *ymgC*) genes [77]  
935 (Figures 13 and S28 and Table S13).

936 Expression of fimbriae (*fim*) and curli fibers (*csg*), important for adhesion in  
937 biofilm formation [73] were also up-regulated only by PMA (Figure 13 and S28), as were  
938 15 of 22 FimA homologs of unknown function. Outer membrane vesicle formation  
939 (OMVs) could also play a role in detoxification, since an increase in formation of these  
940 vesicles has been associated with heat shock, oxidative stress response, and biofilm  
941 formation [128], which are responses up-regulated to varying degrees by both  
942 mercurials. These are distinct differences between PMA and HgCl<sub>2</sub> response. PMA  
943 provocation of biofilm formation and adhesion genes might be an artifact of its DMSO  
944 solvent, but it is not obvious why HgCl<sub>2</sub> induces such high increases in biofilm dispersal  
945 genes.

946

947 (c) Phosphate metabolism. Phosphate uptake genes were among the most highly up-  
948 regulated genes for PMA exposure (Figure 9, S23, and Table 2). The PhoBR two-  
949 component system controls expression of phosphate transport genes, as well as some  
950 genes that increase virulence including those for fimbriae and biofilm formation [129].  
951 Since expression of PhoBR and its regulon increases under phosphate limiting  
952 conditions [130], it may be that PMA inhibits phosphate uptake by an unknown  
953 mechanism, possibly through direct interaction with highly up-regulated PstS or this  
954 could be an artifact of DMSO.

955

956 (d) Amino acid biosynthesis. Expression of most amino acid pathways was turned down  
957 by both compounds, but a few responded uniquely to each mercurial (Figures 8 and  
958 S22 and Table S13). Since methionine auxotrophy occurs under oxidative stress due to

959 ROS susceptibility of methionine synthase (MetE) [131], expression of methionine  
960 biosynthesis genes may have been increased by HgCl<sub>2</sub>, which provoked a stronger  
961 oxidative stress response than PMA. However, since PMA did provoke some oxidative  
962 stress response, it is curious that Met operon expression was strongly down under PMA  
963 exposure. Next to its affinity for cysteine sulfur, Hg(II) binds the imino nitrogen of  
964 histidine very strongly [132], so it was intriguing that histidine biosynthesis genes were  
965 also up-regulated by HgCl<sub>2</sub> but down-regulated by PMA. It remains unclear how these  
966 differences or the opposite responses for leucine, isoleucine and valine biosynthesis  
967 help the cell survive mercurial exposure.

968

969 (e) Miscellaneous genes. Multiple antibiotic efflux systems and polymyxin resistance  
970 surface modifications were up-regulated by HgCl<sub>2</sub> exposure, and even more so by PMA  
971 (Figures 11 and S26 and Table S13). Chronic mercury exposure contributes to the  
972 spread of multiple antibiotic resistant bacteria through co-selection of plasmid-borne  
973 antibiotic and mercury resistance genes [133, 134]. Increased expression of antibiotic  
974 resistance and surface components hint that low-level mercury exposure could prime  
975 cells for increased antibiotic resistance. However, the ubiquity of plasmid- and  
976 transposon-borne Hg resistance loci suggests that expression of these chromosomal  
977 genes offers insufficient protection against the antibiotic or mercurial levels encountered  
978 in clinical practice.

979 A handful of vestigial e14 or CPS-53 prophage genes were up-regulated by  
980 HgCl<sub>2</sub> (Table 1) or PMA (Table S5), respectively. Some are known to increase

981 resistance to osmotic, oxidative, and acid stressors [135, 136], but their roles and  
982 mechanisms have not been well defined.

983

984 (f) Differential expression of genes required for the same functional protein complex.

985 In many instances we observed that transcripts for subunits of the same enzyme,  
986 protein complex, or component of a tightly articulated pathway were differentially  
987 expressed. In some cases these proteins lie in distinct transcripts, which may  
988 experience different turnover rates and in other cases the differences could be due to  
989 transcriptional polarity. We have chosen not to deal explicitly with such paradoxes in  
990 this work, which is sufficiently complex as it is, but will address them in future work.

991

## 992 **CONCLUSIONS**

993 The effects of mercury exposure in multicellular organisms have long been  
994 studied at the physiological level but a global, fine grained understanding of the  
995 differences in the precise biochemical sequelae of inorganic and organic mercury  
996 exposure has been lacking. This study is the first to examine not only the transcriptional  
997 response differences between inorganic mercury ( $\text{HgCl}_2$ ) and an organomercurial  
998 (phenylmercuric acetate) in a model microorganism, but also first to examine  
999 longitudinally how the cell recovers from these chemically distinct compounds. Taken  
1000 together with global identification of vulnerable protein targets (Zink et al. in preparation)  
1001 and of damage to thiol and metal ion homeostasis upon acute mercurial exposure [23],  
1002 the current work provides a quantitative systems-level description of the effects of *in*  
1003 *vivo* mercury exposure in *E. coli*. What was striking and most challenging with this study

1004 was the breadth and diversity of the systems whose expression was affected by these  
1005 two chemically distinct mercurials. Sub-acute exposure influenced expression of ~45%  
1006 of all genes with many distinct responses for each compound, reflecting differential  
1007 biochemical damage by each mercurial and the corresponding resources available for  
1008 repair. Energy production, intermediary metabolism and most uptake pathways were  
1009 initially down-regulated by both mercurials, but nearly all stress response systems were  
1010 up-regulated early by at least one compound. These results echo the wide functional  
1011 variety of proteins stably modified by these mercurials owing to the widespread  
1012 occurrence of cysteines found in nearly all *E. coli* proteins. Microbiome studies are  
1013 rapidly unveiling the importance of commensal bacteria to the health of all higher  
1014 organisms. Our findings in this model commensal organism provide insights into how  
1015 chronic mercury exposure might affect such complex microbial communities and,  
1016 consequently, the health of the host. This work also serves as a foundation for studies  
1017 now underway of how the widely found mobile Hg resistance (*mer*) locus assists the cell  
1018 in recovery from Hg exposure.

1019

1020 **LIST OF ABBREVIATIONS:**

1021 Hg = mercury

1022 HgCl<sub>2</sub> = mercuric chloride

1023 PMA = phenylmercuric acetate

1024 PhHg = phenylmercury

1025 DMSO = dimethyl sulfoxide

1026 LB = Luria-Bertani medium

1027 NM3 = Neidhardt MOPS minimal medium

1028 NGS = next generation sequencing

1029 DEGs = differentially expressed genes

1030 CVAA = cold vapor atomic absorption

1031 GSH = glutathione

1032 Cys = cysteine

1033 MDR = multidrug resistance

1034 ncRNA = non-coding RNA

1035 COGs = clusters of orthologous groups

1036 GOFs = gene-ontology functions

1037 RNAP = RNA polymerase

1038 HSP = heat shock protein

1039 ETC = electron transport chain

1040 PGA = poly- $\beta$ -1,6-N-acetyl-glucosamine

1041

1042 **DECLARATIONS**

1043 **Ethics approval and consent to participate:** Not applicable

1044 **Consent for publication:** Not applicable

1045 **Availability of data and materials:** The tabulated datasets supporting the conclusions

1046 of this article are included as additional files. The read counts and raw sequence data

1047 (.fastq) are stored in the Gene Expression Omnibus database

1048 (<http://www.ncbi.nlm.nih.gov/geo/>) with accession ID: GSE95575; they are available to

1049 reviewers upon request and will be open to the public when the manuscript has  
1050 been published.

1051 **Competing interest:** The authors declare that they have no competing interests.

1052 **Funding:** US Department of Energy awards ER64408 and ER65286 to AOS

1053 **Authors' contributions:** SL conceived and designed experiments, prepared biological  
1054 samples, extracted ribosomal depleted RNA for RNA-Seq, performed all data analysis,  
1055 and drafted manuscript. AOS was a major contributor in experimental design, feedback  
1056 on data analysis, and in editing the manuscript. All authors read and approved the  
1057 manuscript.

1058

## 1059 **ACKNOWLEDGMENTS**

1060 We thank Roger Nilsen at the Georgia Genomics Facility for library preparation and  
1061 Sharron Crane at Rutgers University for Hg content analysis. We also thank Bryndan  
1062 Durham, Brandon Satinsky, Mary Ann Moran, Michael K. Johnson, Harry Dailey,  
1063 Timothy Hoover, Anna Karls, Alexander Johs, Jerry Parks, Susan Miller, and Andrew  
1064 Wiggins who have provided feedback and discussion on this work. This work was  
1065 supported by US Department of Energy awards ER64408 and ER65286 to AOS.

1066

## 1067 **REFERENCES**

1068

1069 1. Driscoll CT, Mason RP, Chan HM, Jacob DJ, Pirrone N. Mercury as a global  
1070 pollutant: sources, pathways, and effects. *Environ Sci Technol.* 2013;47(10):4967-4983.

- 1071 2. Pirrone N, Cinnirella S, Feng X, Finkelman RB, Friedli HR, Leaner J, Mason R,  
1072 Mukherjee AB, Stracher G, Streets DG *et al*: Global Mercury Emissions to the  
1073 Atmosphere from Natural and Anthropogenic Sources. In: Mason R, Pirrone N, editors.  
1074 *Mercury Fate and Transport in the Global Atmosphere: Emissions, Measurements and*  
1075 *Models*. Boston, MA: Springer US;2009. p. 1-47.
- 1076 3. Mason RP, Fitzgerald WF, Morel FMM. The Biogeochemical Cycling of  
1077 Elemental Mercury - Anthropogenic Influences. *Geochimica Et Cosmochimica Acta*.  
1078 1994;58:3191-3198.
- 1079 4. Barkay T, Miller SM, Summers AO. Bacterial mercury resistance from atoms to  
1080 ecosystems. *FEMS Microbiol Rev*. 2003;27(2-3):355-384.
- 1081 5. Crinnion WJ. Environmental medicine, part three: long-term effects of chronic  
1082 low-dose mercury exposure. *Alternative medicine review : a journal of clinical*  
1083 *therapeutic*. 2000;5(3):209-223.
- 1084 6. Richardson GM, Wilson R, Allard D, Purtill C, Douma S, Graviere J. Mercury  
1085 exposure and risks from dental amalgam in the US population, post-2000. *The Science*  
1086 *of the total environment*. 2011;409(20):4257-4268.
- 1087 7. Diez S. Human health effects of methylmercury exposure. *Rev Environ Contam*  
1088 *Toxicol*. 2009;198:111-132.
- 1089 8. Malm O. Gold mining as a source of mercury exposure in the Brazilian Amazon.  
1090 *Environ Res*. 1998;77(2):73-78.



- 1091 9. Clarkson TW, Magos L. The toxicology of mercury and its chemical compounds.  
1092 *Crit Rev Toxicol.* 2006;36(8):609-662.
- 1093 10. Hintelmann H, Hempel M, Wilken RD. Observation of unusual organic mercury  
1094 species in soils and sediments of industrially contaminated sites. *Environ Sci Technol.*  
1095 1995;29(7):1845-1850.
- 1096 11. Tchounwou PB, Ayensu WK, Ninashvili N, Sutton D. Environmental exposure to  
1097 mercury and its toxicopathologic implications for public health. *Environ Toxicol.*  
1098 2003;18(3):149-175.
- 1099 12. Davidson PW, Myers GJ, Weiss B. Mercury exposure and child development  
1100 outcomes. *Pediatrics.* 2004;113(Suppl 4):1023-1029.
- 1101 13. Valko M, Morris H, Cronin MT. Metals, toxicity and oxidative stress. *Curr Med*  
1102 *Chem.* 2005;12(10):1161-1208.
- 1103 14. Yorifuji T, Tsuda T, Takao S, Harada M. Long-term exposure to methylmercury  
1104 and neurologic signs in Minamata and neighboring communities. *Epidemiology.*  
1105 2008;19(1):3-9.
- 1106 15. Zahir F, Rizwi SJ, Haq SK, Khan RH. Low dose mercury toxicity and human  
1107 health. *Environ Toxicol Pharmacol.* 2005;20(2):351-360.
- 1108 16. Cheesman BV, Arnold AP, Rabenstein DL. Nuclear magnetic resonance studies  
1109 of the solution chemistry of metal complexes. 25. Hg(thiol)<sub>3</sub> complexes and HG(II)-thiol  
1110 ligand exchange kinetics. *J Am Chem Soc.* 1988;110:6359-6364.

- 1111 17. Oram PD, Fang X, Fernando Q, Letkeman P, Letkeman D. The formation of  
1112 constants of mercury(II)--glutathione complexes. *Chemical research in toxicology*.  
1113 1996;9(4):709-712.
- 1114 18. Labunskyy VM, Hatfield DL, Gladyshev VN. Selenoproteins: molecular pathways  
1115 and physiological roles. *Physiol Rev*. 2014;94(3):739-777.
- 1116 19. Pal PB, Pal S, Das J, Sil PC. Modulation of mercury-induced mitochondria-  
1117 dependent apoptosis by glycine in hepatocytes. *Amino Acids*. 2012;42(5):1669-1683.
- 1118 20. Shenker BJ, Guo TL, Shapiro IM. Mercury-induced apoptosis in human lymphoid  
1119 cells: evidence that the apoptotic pathway is mercurial species dependent. *Environ Res*.  
1120 2000;84(2):89-99.
- 1121 21. Jomova K, Valko M. Advances in metal-induced oxidative stress and human  
1122 disease. *Toxicology*. 2011;283(2-3):65-87.
- 1123 22. Polacco BJ, Purvine SO, Zink EM, Lavoie SP, Lipton MS, Summers AO, Miller  
1124 SM. Discovering mercury protein modifications in whole proteomes using natural  
1125 isotope distributions observed in liquid chromatography-tandem mass spectrometry. *Mol*  
1126 *Cell Proteomics*. 2011;10(8):M110.004853.
- 1127 23. LaVoie SP, Mapolelo DT, Cowart DM, Polacco BJ, Johnson MK, Scott RA, Miller  
1128 SM, Summers AO. Organic and inorganic mercurials have distinct effects on cellular  
1129 thiols, metal homeostasis, and Fe-binding proteins in *Escherichia coli*. *J Biol Inorg*  
1130 *Chem*. 2015;20(8):1239-1251.

- 1131 24. McElwee MK, Ho LA, Chou JW, Smith MV, Freedman JH. Comparative  
1132 toxicogenomic responses of mercuric and methyl-mercury. *BMC Genomics*.  
1133 2013;14:698.
- 1134 25. Neidhardt FC, Bloch PL, Smith DF. Culture medium for enterobacteria. *Journal of*  
1135 *bacteriology*. 1974;119(3):736-747.
- 1136 26. Stead MB, Agrawal A, Bowden KE, Nasir R, Mohanty BK, Meagher RB, Kushner  
1137 SR. RNAsnap: a rapid, quantitative and inexpensive, method for isolating total RNA  
1138 from bacteria. *Nucleic acids research*. 2012;40(20):e156.
- 1139 27. Langmead B, Salzberg SL. Fast gapped-read alignment with Bowtie 2. *Nature*  
1140 *methods*. 2012;9(4):357-359.
- 1141 28. Li H, Handsaker B, Wysoker A, Fennell T, Ruan J, Homer N, Marth G, Abecasis  
1142 G, Durbin R, Genome Project Data Processing S. The Sequence Alignment/Map format  
1143 and SAMtools. *Bioinformatics*. 2009;25(16):2078-2079.
- 1144 29. Anders S, Pyl PT, Huber W. HTSeq--a Python framework to work with high-  
1145 throughput sequencing data. *Bioinformatics*. 2015;31(2):166-169.
- 1146 30. Hardcastle TJ, Kelly KA. baySeq: empirical Bayesian methods for identifying  
1147 differential expression in sequence count data. *BMC bioinformatics*. 2010;11:422.
- 1148 31. Hamlett NV, Landale EC, Davis BH, Summers AO. Roles of the Tn21 merT,  
1149 merP, and merC gene products in mercury resistance and mercury binding. *Journal of*  
1150 *bacteriology*. 1992;174(20):6377-6385.

- 1151 32. Summers AO, Lewis E. Volatilization of mercuric chloride by mercury-resistant  
1152 plasmid-bearing strains of *Escherichia coli*, *Staphylococcus aureus*, and *Pseudomonas*  
1153 *aeruginosa*. *Journal of bacteriology*. 1973;113(2):1070-1072.
- 1154 33. Summers AO, Silver S. Mercury resistance in a plasmid-bearing strain of  
1155 *Escherichia coli*. *Journal of bacteriology*. 1972;112(3):1228-1236.
- 1156 34. Schaechter M, Santomassino KA. Lysis of *Escherichia coli* by sulfhydryl-binding  
1157 reagents. *Journal of bacteriology*. 1962;84:318-325.
- 1158 35. Janssen BD, Hayes CS. The tmRNA ribosome-rescue system. *Adv Protein*  
1159 *Chem Struct Biol*. 2012;86:151-191.
- 1160 36. Legendre P. Ward's Hierarchical Agglomerative Clustering Method: Which  
1161 Algorithms Implement Ward's Criterion? *Journal of Classification*. 2014;31(3):274-295.
- 1162 37. Szklarczyk D, Franceschini A, Wyder S, Forslund K, Heller D, Huerta-Cepas J,  
1163 Simonovic M, Roth A, Santos A, Tsafou KP *et al*. STRING v10: protein-protein  
1164 interaction networks, integrated over the tree of life. *Nucleic acids research*.  
1165 2015;43(Database issue):D447-452.
- 1166 38. von Mering C, Jensen LJ, Snel B, Hooper SD, Krupp M, Foglierini M, Jouffre N,  
1167 Huynen MA, Bork P. STRING: known and predicted protein-protein associations,  
1168 integrated and transferred across organisms. *Nucleic acids research*.  
1169 2005;33(Database issue):D433-437.

- 1170 39. Arunasri K, Adil M, Khan PA, Shivaji S. Global gene expression analysis of long-  
1171 term stationary phase effects in E. coli K12 MG1655. *PLoS One*. 2014;9(5):e96701.
- 1172 40. Chang DE, Smalley DJ, Conway T. Gene expression profiling of Escherichia coli  
1173 growth transitions: an expanded stringent response model. *Mol Microbiol*.  
1174 2002;45(2):289-306.
- 1175 41. Kuzminov A. Recombinational repair of DNA damage in Escherichia coli and  
1176 bacteriophage lambda. *Microbiol Mol Biol Rev*. 1999;63(4):751-813.
- 1177 42. Lusetti SL, Cox MM. The bacterial RecA protein and the recombinational DNA  
1178 repair of stalled replication forks. *Annu Rev Biochem*. 2002;71:71-100.
- 1179 43. Salgado H, Martinez-Flores I, Lopez-Fuentes A, Garcia-Sotelo JS, Porron-Sotelo  
1180 L, Solano H, Muniz-Rascado L, Collado-Vides J. Extracting regulatory networks of  
1181 Escherichia coli from RegulonDB. *Methods Mol Biol*. 2012;804:179-195.
- 1182 44. Salgado H, Peralta-Gil M, Gama-Castro S, Santos-Zavaleta A, Muniz-Rascado L,  
1183 Garcia-Sotelo JS, Weiss V, Solano-Lira H, Martinez-Flores I, Medina-Rivera A *et al*.  
1184 RegulonDB v8.0: omics data sets, evolutionary conservation, regulatory phrases, cross-  
1185 validated gold standards and more. *Nucleic acids research*. 2013;41(Database  
1186 issue):D203-213.
- 1187 45. Tramonti A, Visca P, De Canio M, Falconi M, De Biase D. Functional  
1188 characterization and regulation of gadX, a gene encoding an AraC/XylS-like  
1189 transcriptional activator of the Escherichia coli glutamic acid decarboxylase system.  
1190 *Journal of bacteriology*. 2002;184(10):2603-2613.

- 1191 46. Nishino K, Senda Y, Yamaguchi A. The AraC-family regulator GadX enhances  
1192 multidrug resistance in *Escherichia coli* by activating expression of mdtEF multidrug  
1193 efflux genes. *J Infect Chemother.* 2008;14(1):23-29.
- 1194 47. Tucker DL, Tucker N, Ma Z, Foster JW, Miranda RL, Cohen PS, Conway T.  
1195 Genes of the GadX-GadW regulon in *Escherichia coli*. *Journal of bacteriology.*  
1196 2003;185(10):3190-3201.
- 1197 48. Lemke JJ, Sanchez-Vazquez P, Burgos HL, Hedberg G, Ross W, Gourse RL.  
1198 Direct regulation of *Escherichia coli* ribosomal protein promoters by the transcription  
1199 factors ppGpp and DksA. *Proc Natl Acad Sci U S A.* 2011;108(14):5712-5717.
- 1200 49. Nomura M, Gourse R, Baughman G. Regulation of the synthesis of ribosomes  
1201 and ribosomal components. *Annu Rev Biochem.* 1984;53:75-117.
- 1202 50. Wilson DN, Nierhaus KH. The weird and wonderful world of bacterial ribosome  
1203 regulation. *Crit Rev Biochem Mol Biol.* 2007;42(3):187-219.
- 1204 51. Soskine M, Steiner-Mordoch S, Schuldiner S. Crosslinking of membrane-  
1205 embedded cysteines reveals contact points in the EmrE oligomer. *Proc Natl Acad Sci U*  
1206 *S A.* 2002;99(19):12043-12048.
- 1207 52. Imesch E, Moosmayer M, Anner BM. Mercury weakens membrane anchoring of  
1208 Na-K-ATPase. *The American journal of physiology.* 1992;262(5):F837-842.

- 1209 53. Carvalho CM, Chew EH, Hashemy SI, Lu J, Holmgren A. Inhibition of the human  
1210 thioredoxin system. A molecular mechanism of mercury toxicity. *J Biol Chem*.  
1211 2008;283(18):11913-11923.
- 1212 54. Georgopoulos C, Welch WJ. Role of the major heat shock proteins as molecular  
1213 chaperones. *Annu Rev Cell Biol*. 1993;9:601-634.
- 1214 55. Carpousis AJ. The RNA degradosome of Escherichia coli: an mRNA-degrading  
1215 machine assembled on RNase E. *Annu Rev Microbiol*. 2007;61:71-87.
- 1216 56. Lim JY, May JM, Cegelski L. Dimethyl sulfoxide and ethanol elicit increased  
1217 amyloid biogenesis and amyloid-integrated biofilm formation in Escherichia coli. *Appl*  
1218 *Environ Microbiol*. 2012;78(9):3369-3378.
- 1219 57. Markarian SA, Poladyan AA, Kirakosyan GR, Trchounian AA, Bagramyan KA.  
1220 Effect of diethylsulphoxide on growth, survival and ion exchange of Escherichia coli. *Lett*  
1221 *Appl Microbiol*. 2002;34(6):417-421.
- 1222 58. Ansaldi M, Bordi C, Lepelletier M, Mejean V. TorC apocytochrome negatively  
1223 autoregulates the trimethylamine N-oxide (TMAO) reductase operon in Escherichia coli.  
1224 *Mol Microbiol*. 1999;33(2):284-295.
- 1225 59. Sorensen KI, Hove-Jensen B. Ribose catabolism of Escherichia coli:  
1226 characterization of the rpiB gene encoding ribose phosphate isomerase B and of the  
1227 rpiR gene, which is involved in regulation of rpiB expression. *Journal of bacteriology*.  
1228 1996;178(4):1003-1011.

- 1229 60. Yamada T, Letunic I, Okuda S, Kanehisa M, Bork P. iPath2.0: interactive  
1230 pathway explorer. *Nucleic acids research*. 2011;39(Web Server issue):W412-415.
- 1231 61. Imlay JA. The molecular mechanisms and physiological consequences of  
1232 oxidative stress: lessons from a model bacterium. *Nat Rev Microbiol*. 2013;11(7):443-  
1233 454.
- 1234 62. Grass G, Otto M, Fricke B, Haney CJ, Rensing C, Nies DH, Munkelt D. FieF  
1235 (YiiP) from *Escherichia coli* mediates decreased cellular accumulation of iron and  
1236 relieves iron stress. *Arch Microbiol*. 2005;183(1):9-18.
- 1237 63. Bandyopadhyay S, Chandramouli K, Johnson MK. Iron-sulfur cluster  
1238 biosynthesis. *Biochem Soc Trans*. 2008;36(Pt 6):1112-1119.
- 1239 64. Johnson DC, Dean DR, Smith AD, Johnson MK. Structure, function, and  
1240 formation of biological iron-sulfur clusters. *Annu Rev Biochem*. 2005;74:247-281.
- 1241 65. Rensing C, Mitra B, Rosen BP. The *zntA* gene of *Escherichia coli* encodes a  
1242 Zn(II)-translocating P-type ATPase. *Proc Natl Acad Sci U S A*. 1997;94(26):14326-  
1243 14331.
- 1244 66. Outten FW, Huffman DL, Hale JA, O'Halloran TV. The independent cue and cus  
1245 systems confer copper tolerance during aerobic and anaerobic growth in *Escherichia*  
1246 *coli*. *J Biol Chem*. 2001;276(33):30670-30677.
- 1247 67. Eitinger T, Mandrand-Berthelot MA. Nickel transport systems in microorganisms.  
1248 *Arch Microbiol*. 2000;173(1):1-9.



- 1249 68. Qin J, Fu HL, Ye J, Bencze KZ, Stemmler TL, Rawlings DE, Rosen BP.  
1250 Convergent evolution of a new arsenic binding site in the ArsR/SmtB family of  
1251 metalloregulators. *J Biol Chem.* 2007;282(47):34346-34355.
- 1252 69. Alekshun MN, Levy SB. The mar regulon: multiple resistance to antibiotics and  
1253 other toxic chemicals. *Trends Microbiol.* 1999;7(10):410-413.
- 1254 70. Nishino K, Yamada J, Hirakawa H, Hirata T, Yamaguchi A. Roles of TolC-  
1255 dependent multidrug transporters of Escherichia coli in resistance to beta-lactams.  
1256 *Antimicrob Agents Chemother.* 2003;47(9):3030-3033.
- 1257 71. Raetz CR, Reynolds CM, Trent MS, Bishop RE. Lipid A modification systems in  
1258 gram-negative bacteria. *Annu Rev Biochem.* 2007;76:295-329.
- 1259 72. Checroun C, Gutierrez C. Sigma(s)-dependent regulation of yehZYXW, which  
1260 encodes a putative osmoprotectant ABC transporter of Escherichia coli. *FEMS Microbiol*  
1261 *Lett.* 2004;236(2):221-226.
- 1262 73. Van Houdt R, Michiels CW. Role of bacterial cell surface structures in  
1263 Escherichia coli biofilm formation. *Res Microbiol.* 2005;156(5-6):626-633.
- 1264 74. Ma Q, Zhang G, Wood TK. Escherichia coli BdcA controls biofilm dispersal in  
1265 Pseudomonas aeruginosa and Rhizobium meliloti. *BMC Res Notes.* 2011;4:447.
- 1266 75. Zhang XS, Garcia-Contreras R, Wood TK. YcfR (BhsA) influences Escherichia  
1267 coli biofilm formation through stress response and surface hydrophobicity. *Journal of*  
1268 *bacteriology.* 2007;189(8):3051-3062.

- 1269 76. Itoh Y, Rice JD, Goller C, Pannuri A, Taylor J, Meisner J, Beveridge TJ, Preston  
1270 JF, 3rd, Romeo T. Roles of pgaABCD genes in synthesis, modification, and export of  
1271 the Escherichia coli biofilm adhesin poly-beta-1,6-N-acetyl-D-glucosamine. *Journal of*  
1272 *bacteriology*. 2008;190(10):3670-3680.
- 1273 77. Lee J, Page R, Garcia-Contreras R, Palermينو JM, Zhang XS, Doshi O, Wood  
1274 TK, Peti W. Structure and function of the Escherichia coli protein YmgB: a protein  
1275 critical for biofilm formation and acid-resistance. *J Mol Biol*. 2007;373(1):11-26.
- 1276 78. Cegelski L, Pinkner JS, Hammer ND, Cusumano CK, Hung CS, Chorell E, Aberg  
1277 V, Walker JN, Seed PC, Almqvist F *et al*. Small-molecule inhibitors target Escherichia  
1278 coli amyloid biogenesis and biofilm formation. *Nat Chem Biol*. 2009;5(12):913-919.
- 1279 79. Seo SW, Kim D, Szubin R, Palsson BO. Genome-wide Reconstruction of OxyR  
1280 and SoxRS Transcriptional Regulatory Networks under Oxidative Stress in Escherichia  
1281 coli K-12 MG1655. *Cell Rep*. 2015;12(8):1289-1299.
- 1282 80. Choi H, Kim S, Mukhopadhyay P, Cho S, Woo J, Storz G, Ryu SE. Structural  
1283 basis of the redox switch in the OxyR transcription factor. *Cell*. 2001;105(1):103-113.
- 1284 81. Altuvia S, Zhang A, Argaman L, Tiwari A, Storz G. The Escherichia coli OxyS  
1285 regulatory RNA represses fhIA translation by blocking ribosome binding. *EMBO J*.  
1286 1998;17(20):6069-6075.
- 1287 82. Amabile-Cuevas CF, Demple B. Molecular characterization of the soxRS genes  
1288 of Escherichia coli: two genes control a superoxide stress regulon. *Nucleic acids*  
1289 *research*. 1991;19(16):4479-4484.

- 1290 83. Greenberg JT, Monach P, Chou JH, Josephy PD, Demple B. Positive control of a  
1291 global antioxidant defense regulon activated by superoxide-generating agents in  
1292 *Escherichia coli*. *Proc Natl Acad Sci U S A*. 1990;87(16):6181-6185.
- 1293 84. Tsaneva IR, Weiss B. soxR, a locus governing a superoxide response regulon in  
1294 *Escherichia coli* K-12. *Journal of bacteriology*. 1990;172(8):4197-4205.
- 1295 85. Watanabe S, Kita A, Kobayashi K, Miki K. Crystal structure of the [2Fe-2S]  
1296 oxidative-stress sensor SoxR bound to DNA. *Proc Natl Acad Sci U S A*.  
1297 2008;105(11):4121-4126.
- 1298 86. Keseler IM, Mackie A, Peralta-Gil M, Santos-Zavaleta A, Gama-Castro S,  
1299 Bonavides-Martinez C, Fulcher C, Huerta AM, Kothari A, Krummenacker M *et al*.  
1300 EcoCyc: fusing model organism databases with systems biology. *Nucleic acids*  
1301 *research*. 2013;41(Database issue):D605-612.
- 1302 87. Anjem A, Varghese S, Imlay JA. Manganese import is a key element of the OxyR  
1303 response to hydrogen peroxide in *Escherichia coli*. *Mol Microbiol*. 2009;72(4):844-858.
- 1304 88. Park SJ, Gunsalus RP. Oxygen, iron, carbon, and superoxide control of the  
1305 fumarase fumA and fumC genes of *Escherichia coli*: role of the arcA, fnr, and soxR  
1306 gene products. *Journal of bacteriology*. 1995;177(21):6255-6262.
- 1307 89. Varghese S, Tang Y, Imlay JA. Contrasting sensitivities of *Escherichia coli*  
1308 aconitases A and B to oxidation and iron depletion. *Journal of bacteriology*.  
1309 2003;185(1):221-230.

- 1310 90. Eser M, Masip L, Kadokura H, Georgiou G, Beckwith J. Disulfide bond formation  
1311 by exported glutaredoxin indicates glutathione's presence in the E. coli periplasm. *Proc*  
1312 *Natl Acad Sci U S A*. 2009;106(5):1572-1577.
- 1313 91. Suzuki H, Koyanagi T, Izuka S, Onishi A, Kumagai H. The yliA, -B, -C, and -D  
1314 genes of Escherichia coli K-12 encode a novel glutathione importer with an ATP-binding  
1315 cassette. *Journal of bacteriology*. 2005;187(17):5861-5867.
- 1316 92. Vuilleumier S. Bacterial glutathione S-transferases: what are they good for?  
1317 *Journal of bacteriology*. 1997;179(5):1431-1441.
- 1318 93. Summers AO, Wireman J, Vimy MJ, Lorscheider FL, Marshall B, Levy SB,  
1319 Bennett S, Billard L. Mercury released from dental "silver" fillings provokes an increase  
1320 in mercury- and antibiotic-resistant bacteria in oral and intestinal floras of primates.  
1321 *Antimicrob Agents Chemother*. 1993;37(4):825-834.
- 1322 94. US - Food & Drug Administration (FDA): Mercury Levels in Commercial Fish and  
1323 Shellfish (1990-2012)  
1324 <http://www.fda.gov/Food/FoodborneIllnessContaminants/Metals/ucm115644.htm>
- 1325 95. McElwee MK, Freedman JH. Comparative toxicology of mercurials in  
1326 *Caenorhabditis elegans*. *Environ Toxicol Chem*. 2011;30(9):2135-2141.
- 1327 96. Ung CY, Lam SH, Hlaing MM, Winata CL, Korzh S, Mathavan S, Gong Z.  
1328 Mercury-induced hepatotoxicity in zebrafish: in vivo mechanistic insights from  
1329 transcriptome analysis, phenotype anchoring and targeted gene expression validation.  
1330 *BMC Genomics*. 2010;11:212.

- 1331 97. Lash LH, Zalups RK. Alterations in renal cellular glutathione metabolism after in  
1332 vivo administration of a subtoxic dose of mercuric chloride. *J Biochem Toxicol*.  
1333 1996;11(1):1-9.
- 1334 98. Lu X, Xiang Y, Yang G, Zhang L, Wang H, Zhong S. Transcriptomic  
1335 characterization of zebrafish larvae in response to mercury exposure. *Comp Biochem*  
1336 *Physiol C Toxicol Pharmacol*. 2017;192:40-49.
- 1337 99. Zheng M, Wang X, Templeton LJ, Smulski DR, LaRossa RA, Storz G. DNA  
1338 microarray-mediated transcriptional profiling of the Escherichia coli response to  
1339 hydrogen peroxide. *Journal of bacteriology*. 2001;183(15):4562-4570.
- 1340 100. Kanai T, Takahashi K, Inoue H. Three distinct-type glutathione S-transferases  
1341 from Escherichia coli important for defense against oxidative stress. *J Biochem*.  
1342 2006;140(5):703-711.
- 1343 101. Xu FF, Imlay JA. Silver(I), mercury(II), cadmium(II), and zinc(II) target exposed  
1344 enzymic iron-sulfur clusters when they toxify Escherichia coli. *Appl Environ Microbiol*.  
1345 2012;78(10):3614-3621.
- 1346 102. Varghese S, Wu A, Park S, Imlay KR, Imlay JA. Submicromolar hydrogen  
1347 peroxide disrupts the ability of Fur protein to control free-iron levels in Escherichia coli.  
1348 *Mol Microbiol*. 2007;64(3):822-830.
- 1349 103. Bagg A, Neilands JB. Ferric uptake regulation protein acts as a repressor,  
1350 employing iron (II) as a cofactor to bind the operator of an iron transport operon in  
1351 Escherichia coli. *Biochemistry*. 1987;26(17):5471-5477.

- 1352 104. de Lorenzo V, Wee S, Herrero M, Neilands JB. Operator sequences of the  
1353 aerobactin operon of plasmid ColV-K30 binding the ferric uptake regulation (fur)  
1354 repressor. *Journal of bacteriology*. 1987;169(6):2624-2630.
- 1355 105. Fontecave M, Choudens SO, Py B, Barras F. Mechanisms of iron-sulfur cluster  
1356 assembly: the SUF machinery. *J Biol Inorg Chem*. 2005;10(7):713-721.
- 1357 106. Zhao G, Ceci P, Ilari A, Giangiacomo L, Laue TM, Chiancone E, Chasteen ND.  
1358 Iron and hydrogen peroxide detoxification properties of DNA-binding protein from  
1359 starved cells. A ferritin-like DNA-binding protein of Escherichia coli. *J Biol Chem*.  
1360 2002;277(31):27689-27696.
- 1361 107. Lund BO, Miller DM, Woods JS. Mercury-induced H<sub>2</sub>O<sub>2</sub> production and lipid  
1362 peroxidation in vitro in rat kidney mitochondria. *Biochem Pharmacol*. 1991;42  
1363 Suppl:S181-187.
- 1364 108. Liochev SI, Fridovich I. Modulation of the fumarases of Escherichia coli in  
1365 response to oxidative stress. *Arch Biochem Biophys*. 1993;301(2):379-384.
- 1366 109. Martin JE, Imlay JA. The alternative aerobic ribonucleotide reductase of  
1367 Escherichia coli, NrdEF, is a manganese-dependent enzyme that enables cell  
1368 replication during periods of iron starvation. *Mol Microbiol*. 2011;80(2):319-334.
- 1369 110. Jordan A, Aslund F, Pontis E, Reichard P, Holmgren A. Characterization of  
1370 Escherichia coli NrdH. A glutaredoxin-like protein with a thioredoxin-like activity profile. *J*  
1371 *Biol Chem*. 1997;272(29):18044-18050.

- 1372 111. Sharma SK, Goloubinoff P, Christen P. Heavy metal ions are potent inhibitors of  
1373 protein folding. *Biochem Biophys Res Commun.* 2008;372(2):341-345.
- 1374 112. Arsene F, Tomoyasu T, Bukau B. The heat shock response of Escherichia coli.  
1375 *Int J Food Microbiol.* 2000;55(1-3):3-9.
- 1376 113. Bissonnette SA, Rivera-Rivera I, Sauer RT, Baker TA. The IbpA and IbpB small  
1377 heat-shock proteins are substrates of the AAA+ Lon protease. *Mol Microbiol.*  
1378 2010;75(6):1539-1549.
- 1379 114. Gaubig LC, Waldminghaus T, Narberhaus F. Multiple layers of control govern  
1380 expression of the Escherichia coli ibpAB heat-shock operon. *Microbiology.* 2011;157(Pt  
1381 1):66-76.
- 1382 115. Matuszewska E, Kwiatkowska J, Kuczynska-Wisnik D, Laskowska E. Escherichia  
1383 coli heat-shock proteins IbpA/B are involved in resistance to oxidative stress induced by  
1384 copper. *Microbiology.* 2008;154(Pt 6):1739-1747.
- 1385 116. Wang A, Crowley DE. Global gene expression responses to cadmium toxicity in  
1386 Escherichia coli. *Journal of bacteriology.* 2005;187(9):3259-3266.
- 1387 117. Salmon K, Hung SP, Mekjian K, Baldi P, Hatfield GW, Gunsalus RP. Global gene  
1388 expression profiling in Escherichia coli K12. The effects of oxygen availability and FNR.  
1389 *J Biol Chem.* 2003;278(32):29837-29855.
- 1390 118. Bibikov SI, Biran R, Rudd KE, Parkinson JS. A signal transducer for aerotaxis in  
1391 Escherichia coli. *Journal of bacteriology.* 1997;179(12):4075-4079.

- 1392 119. Pruss BM, Campbell JW, Van Dyk TK, Zhu C, Kogan Y, Matsumura P. FlhD/FlhC  
1393 is a regulator of anaerobic respiration and the Entner-Doudoroff pathway through  
1394 induction of the methyl-accepting chemotaxis protein Aer. *Journal of bacteriology*.  
1395 2003;185(2):534-543.
- 1396 120. Funk AE, Day FA, Brady FO. Displacement of zinc and copper from copper-  
1397 induced metallothionein by cadmium and by mercury: in vivo and ex vivo studies. *Comp*  
1398 *Biochem Physiol C*. 1987;86(1):1-6.
- 1399 121. O'Connor TR, Graves RJ, de Murcia G, Castaing B, Laval J. Fpg protein of  
1400 Escherichia coli is a zinc finger protein whose cysteine residues have a structural and/or  
1401 functional role. *J Biol Chem*. 1993;268(12):9063-9070.
- 1402 122. Binet MR, Poole RK. Cd(II), Pb(II) and Zn(II) ions regulate expression of the  
1403 metal-transporting P-type ATPase ZntA in Escherichia coli. *FEBS Lett*. 2000;473(1):67-  
1404 70.
- 1405 123. Sharma R, Rensing C, Rosen BP, Mitra B. The ATP hydrolytic activity of purified  
1406 ZntA, a Pb(II)/Cd(II)/Zn(II)-translocating ATPase from Escherichia coli. *J Biol Chem*.  
1407 2000;275(6):3873-3878.
- 1408 124. Fitzgerald DM, Bonocora RP, Wade JT. Comprehensive mapping of the  
1409 Escherichia coli flagellar regulatory network. *PLoS Genet*. 2014;10(10):e1004649.
- 1410 125. Dong T, Yu R, Schellhorn H. Antagonistic regulation of motility and transcriptome  
1411 expression by RpoN and RpoS in Escherichia coli. *Mol Microbiol*. 2011;79(2):375-386.



- 1412 126. De Lay N, Gottesman S. A complex network of small non-coding RNAs regulate  
1413 motility in *Escherichia coli*. *Mol Microbiol*. 2012;86(3):524-538.
- 1414 127. Mermoud M, Magnani D, Solioz M, Stoyanov JV. The copper-inducible ComR  
1415 (YcfQ) repressor regulates expression of ComC (YcfR), which affects copper  
1416 permeability of the outer membrane of *Escherichia coli*. *Biomaterials*. 2012;25(1):33-43.
- 1417 128. Schwechheimer C, Kuehn MJ. Outer-membrane vesicles from Gram-negative  
1418 bacteria: biogenesis and functions. *Nat Rev Microbiol*. 2015;13(10):605-619.
- 1419 129. Crepin S, Chekabab SM, Le Bihan G, Bertrand N, Dozois CM, Harel J. The Pho  
1420 regulon and the pathogenesis of *Escherichia coli*. *Vet Microbiol*. 2011;153(1-2):82-88.
- 1421 130. Hsieh YJ, Wanner BL. Global regulation by the seven-component Pi signaling  
1422 system. *Curr Opin Microbiol*. 2010;13(2):198-203.
- 1423 131. Hondorp ER, Matthews RG. Oxidative stress inactivates cobalamin-independent  
1424 methionine synthase (MetE) in *Escherichia coli*. *PLoS Biol*. 2004;2(11):e336.
- 1425 132. Brooks P, Davidson N. Mercury(II) Complexes of Imidazole and Histidine.  
1426 *Journal of the American Chemical Society*. 1960;82(9):2118-2123.
- 1427 133. Pal C, Bengtsson-Palme J, Kristiansson E, Larsson DG. Co-occurrence of  
1428 resistance genes to antibiotics, biocides and metals reveals novel insights into their co-  
1429 selection potential. *BMC Genomics*. 2015;16(1):964.

- 1430 134. Wireman J, Liebert CA, Smith T, Summers AO. Association of mercury  
1431 resistance with antibiotic resistance in the gram-negative fecal bacteria of primates.  
1432 *Appl Environ Microbiol.* 1997;63(11):4494-4503.
- 1433 135. Mehta P, Casjens S, Krishnaswamy S. Analysis of the lambdoid prophage  
1434 element e14 in the E. coli K-12 genome. *BMC Microbiol.* 2004;4:4.
- 1435 136. Wang X, Kim Y, Ma Q, Hong SH, Pokusaeva K, Sturino JM, Wood TK. Cryptic  
1436 prophages help bacteria cope with adverse environments. *Nat Commun.* 2010;1:147.  
1437  
1438  
1439  
1440  
1441  
1442  
1443  
1444  
1445  
1446  
1447  
1448  
1449  
1450  
1451  
1452

1453 **Table 1: Genes with  $\geq 20$  fold-change for at least two time points after HgCl<sub>2</sub> exposure (n = 25).**

| Gene ID | Gene Name   | Product Description                                             | Hg t10      | Hg t30      | Hg t60     | PMA t10   | PMA t30    | PMA t60 |
|---------|-------------|-----------------------------------------------------------------|-------------|-------------|------------|-----------|------------|---------|
| b1112   | <b>bhsA</b> | Biofilm, cell surface and signaling defects, YhcN family        | <b>1949</b> | <b>563</b>  | <b>94</b>  | <b>46</b> | <b>21</b>  | n.s.    |
| b4458   | oxyS        | OxyS sRNA activates genes that detoxify oxidative damage        | <b>1524</b> | <b>1292</b> | <b>150</b> | 10        | 6          | n.s.    |
| b4249   | bdcA        | c-di-GMP-binding biofilm dispersal mediator protein             | <b>596</b>  | <b>79</b>   | 7          | 16        | 2          | n.s.    |
| b3686   | <b>ibpB</b> | Chaperone, heat-inducible protein of HSP20 family               | <b>402</b>  | <b>124</b>  | <b>281</b> | <b>37</b> | <b>211</b> | 9       |
| b0812   | dps         | Stress-induced Fe-binding and storage protein                   | <b>339</b>  | <b>52</b>   | n.s.       | 4         | 2          | n.s.    |
| b4248   | yjgH        | Putative reactive intermediate deaminase, UPF0076 family        | <b>296</b>  | <b>24</b>   | 3          | 6         | 2          | n.s.    |
| b0849   | grxA        | Glutaredoxin 1                                                  | <b>246</b>  | <b>33</b>   | n.s.       | 14        | 4          | n.s.    |
| b1144   | ymfJ        | Function unknown, e14 prophage                                  | <b>185</b>  | <b>39</b>   | n.s.       | 3         | 3          | n.s.    |
| b2582   | <b>trxC</b> | Thioredoxin 2, zinc-binding; Trx2                               | <b>134</b>  | <b>50</b>   | 7          | <b>24</b> | <b>24</b>  | n.s.    |
| b1147   | ymfL        | Function unknown, e14 prophage                                  | <b>95</b>   | <b>29</b>   | n.s.       | n.s.      | 3          | n.s.    |
| b1146   | croE        | Cro-like repressor, e14 prophage                                | <b>90</b>   | <b>40</b>   | n.s.       | n.s.      | n.s.       | n.s.    |
| b3687   | <b>ibpA</b> | Chaperone, heat-inducible protein of HSP20 family               | <b>86</b>   | 19          | <b>41</b>  | 10        | <b>28</b>  | 4       |
| b2531   | iscR        | Transcriptional repressor for isc operon; contains Fe-S cluster | <b>62</b>   | <b>48</b>   | 9          | 12        | 18         | n.s.    |
| b1148   | ymfM        | Function unknown, e14 prophage                                  | <b>49</b>   | <b>21</b>   | n.s.       | n.s.      | n.s.       | n.s.    |
| b4599   | yneM        | function unknown, membrane-associated; regulated by PhoPQ       | <b>38</b>   | <b>36</b>   | n.s.       | 3         | 3          | n.s.    |
| b2673   | nrdH        | NrdH-redoxin reducing oxidized NrdEF                            | <b>35</b>   | <b>127</b>  | <b>21</b>  | 7         | 14         | n.s.    |
| b4030   | <b>psiE</b> | Pho regulon, regulated by phoB and cAMP                         | <b>35</b>   | <b>64</b>   | 17         | <b>38</b> | <b>59</b>  | n.s.    |
| b1684   | sufA        | Scaffold protein for assembly of iron-sulfur clusters           | <b>32</b>   | <b>39</b>   | 5          | n.s.      | 3          | n.s.    |
| b1748   | <b>astC</b> | Succinylornithine transaminase; carbon starvation protein       | <b>30</b>   | <b>31</b>   | <b>25</b>  | <b>34</b> | <b>36</b>  | n.s.    |
| b4663   | <b>azuC</b> | Function unknown; membrane-associated                           | <b>27</b>   | <b>25</b>   | <b>36</b>  | <b>41</b> | <b>49</b>  | n.s.    |
| b0484   | copA        | Copper-, silver-translocating P-type ATPase efflux pump         | <b>25</b>   | <b>20</b>   | n.s.       | 5         | n.s.       | -10     |
| b2674   | nrdI        | Flavodoxin required for NrdEF cluster assembly                  | <b>21</b>   | <b>73</b>   | <b>22</b>  | 4         | 7          | n.s.    |
| b1747   | astA        | Arginine succinyltransferase, arginine catabolism               | 10          | <b>20</b>   | <b>29</b>  | 9         | 14         | n.s.    |
| b1020   | <b>phoH</b> | ATP-binding protein, function unknown                           | 8           | <b>71</b>   | <b>221</b> | <b>61</b> | <b>365</b> | n.s.    |
| b4002   | zraP        | Zn-dependent periplasmic chaperone                              | 3           | <b>27</b>   | <b>43</b>  | n.s.      | n.s.       | -3      |

1454 Table is sorted by Hg at 10 min column. n.s. = not significantly different from unexposed culture and boldface highlights actual values  
1455  $\geq 20$ -fold. Gene names in boldface have a  $\geq 20$  differential expression response to both Hg and PMA in at least one time point (n =  
1456 8).

1457 **Table 2: Genes with  $\geq 20$  fold-change in at least two time points for PMA exposure (n= 17).**

| Gene ID | Gene Name   | Product Description                                           | Hg t10      | Hg t30     | Hg t60     | PMA t10   | PMA t30    | PMA t60   |
|---------|-------------|---------------------------------------------------------------|-------------|------------|------------|-----------|------------|-----------|
| b3728   | pstS        | ABC phosphate transport system; periplasmic binding protein   | n.s.        | 16         | 8          | <b>86</b> | <b>165</b> | n.s.      |
| b1020   | <b>phoH</b> | ATP-binding protein, function unknown                         | 8           | <b>71</b>  | <b>221</b> | <b>61</b> | <b>365</b> | n.s.      |
| b0996   | torC        | c-Type cytochrome                                             | n.s.        | n.s.       | n.s.       | <b>55</b> | <b>65</b>  | <b>77</b> |
| b4060   | <b>yjcB</b> | Function unknown                                              | <b>33</b>   | 11         | 12         | <b>52</b> | <b>35</b>  | n.s.      |
| b0399   | <b>phoB</b> | Positive response regulator for pho regulon                   | 4           | <b>22</b>  | 3          | <b>51</b> | <b>105</b> | n.s.      |
| b1530   | <b>marR</b> | Transcription repressor of multiple antibiotic resistance     | <b>26</b>   | 7          | n.s.       | <b>48</b> | <b>29</b>  | n.s.      |
| b1531   | marA        | Transcriptional activator for multiple antibiotic resistance; | 15          | 9          | n.s.       | <b>46</b> | <b>31</b>  | n.s.      |
| b1112   | <b>bhsA</b> | Biofilm, cell surface and signaling defects, YhcN family      | <b>1949</b> | <b>563</b> | <b>94</b>  | <b>46</b> | <b>21</b>  | n.s.      |
| b1532   | marB        | marRAB multiple antibiotic resistance operon                  | 16          | 8          | n.s.       | <b>45</b> | <b>27</b>  | n.s.      |
| b4663   | <b>azuC</b> | Function unknown; membrane-associated                         | <b>27</b>   | <b>25</b>  | <b>36</b>  | <b>41</b> | <b>49</b>  | n.s.      |
| b4030   | <b>psiE</b> | Pho regulon, regulated by phoB and cAMP                       | <b>35</b>   | <b>64</b>  | 17         | <b>38</b> | <b>59</b>  | n.s.      |
| b3686   | <b>ibpB</b> | Chaperone, heat-inducible protein of HSP20 family             | <b>402</b>  | <b>124</b> | <b>281</b> | <b>37</b> | <b>211</b> | 9         |
| b1748   | <b>astC</b> | Succinylornithine transaminase; carbon starvation protein     | <b>30</b>   | <b>31</b>  | <b>25</b>  | <b>34</b> | <b>36</b>  | n.s.      |
| b3469   | <b>zntA</b> | Zn(II), Cd(II), and Pb(II) translocating P-type ATPase        | <b>40</b>   | 19         | 8          | <b>29</b> | <b>22</b>  | n.s.      |
| b2582   | <b>trxC</b> | Thioredoxin 2, zinc-binding; Trx2                             | <b>134</b>  | <b>50</b>  | 7          | <b>24</b> | <b>24</b>  | n.s.      |
| b4354   | yjiY        | Predicted transporter, function unknown                       | n.s.        | n.s.       | n.s.       | <b>20</b> | <b>77</b>  | n.s.      |
| b1625   | cnu         | OriC-binding complex H-NS/Cnu                                 | n.s.        | 10         | n.s.       | <b>20</b> | <b>24</b>  | n.s.      |

1458

1459 Table is sorted by PMA at 10 min column. n.s. = not significantly different from unexposed culture and boldface highlights actual

1460 values  $\geq 20$ -fold. Gene names in boldface have a  $\geq 20$  differential expression response to both Hg and PMA in at least one time point

1461 (n = 11).

1462

1463

1464

1465 **Table 3: Changes in transcription factor gene expression.** The sum of transcription  
1466 factor genes either up-regulated or down-regulated is shown with the percentage of the  
1467 total transcription factor genes in parenthesis; percent's do not total 100 because genes  
1468 with no change compared to unexposed cells are not tabulated here. See details in  
1469 Table S12.

1470

| Transcription Factors (n = 203) |         |         |        |         |         |         |
|---------------------------------|---------|---------|--------|---------|---------|---------|
|                                 | Hg_t10  | Hg_t30  | Hg_t60 | PMA_t10 | PMA_t30 | PMA_t60 |
| up                              | 63 (31) | 46 (23) | 14 (7) | 86 (42) | 78 (38) | 1 (0.5) |
| down                            | 28 (14) | 28 (14) | 13 (6) | 22 (11) | 23 (11) | 2 (1)   |

1471

1472

1473

1474

1475

1476

1477

1478

1479

1480

1481

1482

1483

1484

1485

1486 **Figures:**

1487 **a**

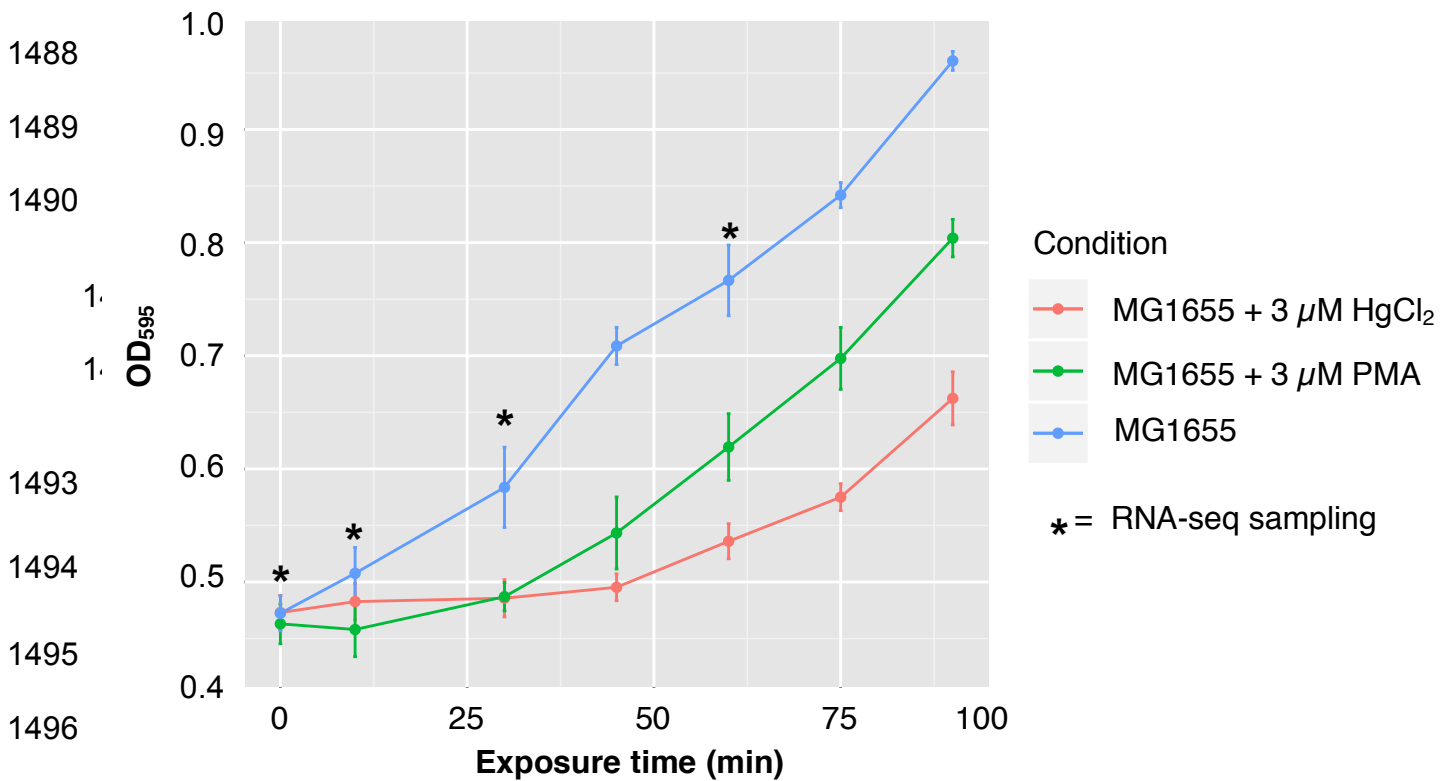

1497 **b**

|                             | t10                                        | t30                                        | t60                                    |
|-----------------------------|--------------------------------------------|--------------------------------------------|----------------------------------------|
| 3 $\mu$ M HgCl <sub>2</sub> | 1,821 (894 $\uparrow$ 927 $\downarrow$ )   | 1,422 (637 $\uparrow$ 785 $\downarrow$ )   | 563 (259 $\uparrow$ 304 $\downarrow$ ) |
| 3 $\mu$ M PMA               | 2,181 (1,261 $\uparrow$ 920 $\downarrow$ ) | 2,009 (1,156 $\uparrow$ 853 $\downarrow$ ) | 65 (36 $\uparrow$ 29 $\downarrow$ )    |

1501 **Figure 1: Effects of sub-acute mercury exposure on growth of MG1655. (a)** *E. coli*  
 1502 K12 MG1655 grown in MOPS minimal medium, unexposed (blue) or exposed to 3  $\mu$ M  
 1503 HgCl<sub>2</sub> (red) or 3  $\mu$ M PMA (green) during mid-log phase. Asterisks indicate sampling  
 1504 times for RNA-seq. Error bars are standard error (SEM) of 3 biological replicates for  
 1505 each culture condition. See Figure S1 for full growth curve. **(b)** Differentially expressed  
 1506 genes (DEG) counts (up or down) for HgCl<sub>2</sub> and PMA relative to unexposed control  
 1507 culture at each time point.

1508

1509

1510

1511

1512

1513

1514

1515

1516

1517

1518

1519

1520

1521

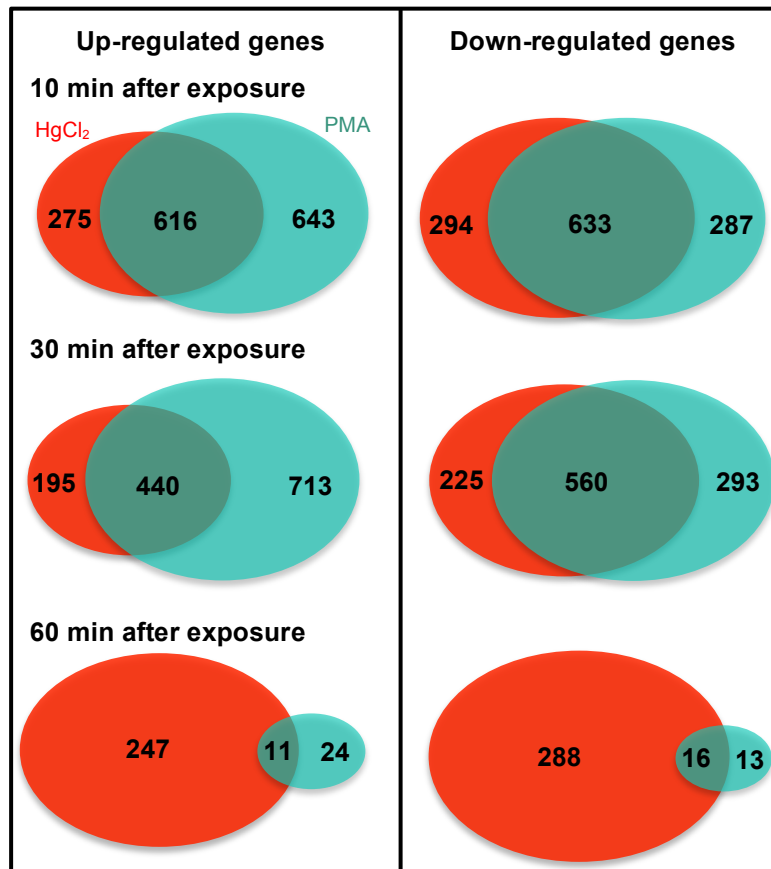

1522 **Figure 2: Overlap between differentially expressed genes at each sampling time**

1523 The 3  $\mu$ M HgCl<sub>2</sub> exposure is in red and the 3  $\mu$ M PMA exposure in green. Ovals are to

1524 scale only at each time point, but not between between time points in a panel nor

1525 between left and right panels.

1526

1527

1528

1529

1530



1531

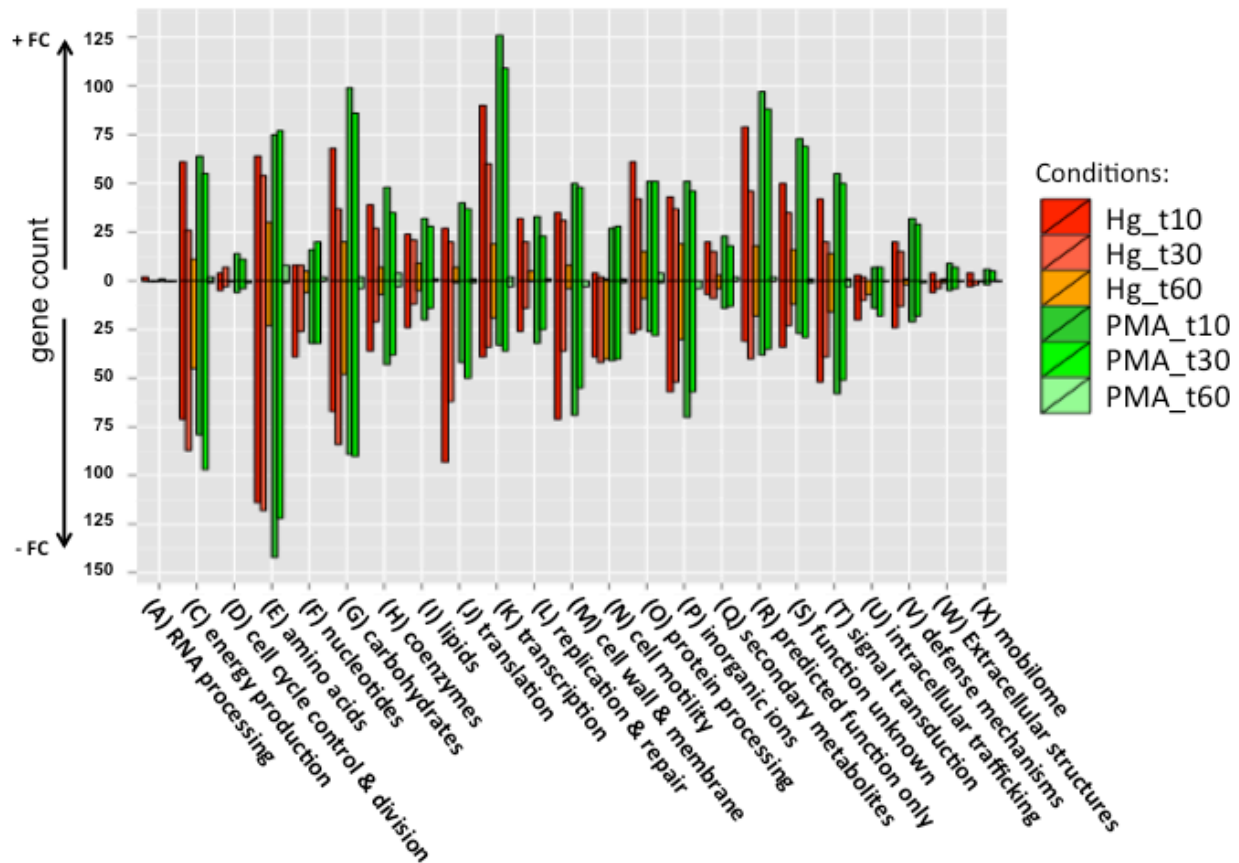

1532

1533 **Figure 3: Counts of differentially expressed genes for each condition grouped by**

1534 **COG functional category.** Genes with a  $\log_2$  fold-change  $\geq 1$  for each condition were

1535 grouped by COG group. Positive counts represent observed up-regulated genes and

1536 negative counts represent observed down-regulated genes. COG code, number of

1537 proteins encoded by genome and category description: (A, 2) RNA processing and

1538 modification; (C, 284) Energy production and conversion; (D, 39) Cell cycle control, cell

1539 division, chromosome partitioning; (E, 355) Amino acid transport and metabolism; (F,

1540 107) Nucleotide transport and metabolism; (G, 381) Carbohydrate transport and

1541 metabolism; (H, 179) Coenzyme transport and metabolism; (I, 121) Lipid transport and

1542 metabolism; (J, 236) Translation, ribosomal structure and biogenesis; (K, 294)

1543 Transcription; (L, 139) Replication, recombination and repair; (M, 242) Cell wall,  
1544 membrane and envelope biogenesis; (N, 102) Cell motility; (O, 156) Post-translational  
1545 modification, protein turnover, chaperones; (P, 223) Inorganic ion transport and  
1546 metabolism; (Q, 68) Secondary metabolites biosynthesis, transport and catabolism; (R,  
1547 261) General function prediction only; (S, 203) Function unknown; (T, 191) Signal  
1548 transduction mechanisms; (U, 50) Intracellular trafficking, secretion, and vesicular  
1549 transport; (V, 91) Defense mechanisms; (W, 31) Extracellular structures; (X, 60)  
1550 Mobilome, prophages, transposons.

1551

1552

1553

1554

1555

1556

1557

1558

1559

1560

1561

1562

1563

1564

1565

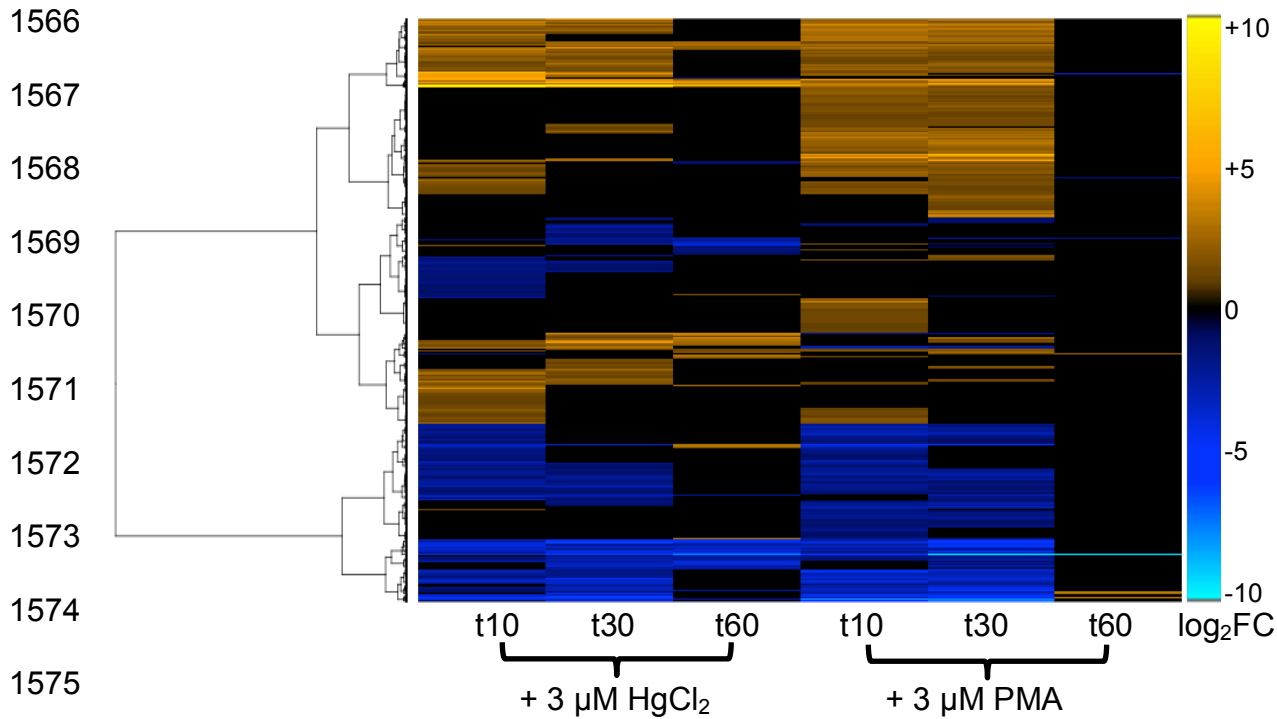

1575

1576

1577 **Figure 4: Differentially expressed genes at each RNA sampling time.** Heat map of

1578 all genes that were differentially expressed in at least one mercury exposure condition

1579 (n = 3,149). Genes were clustered by row using Ward's minimum variance method [36]

1580 with non-squared log<sub>2</sub> fold-change input values.

1581

1582

1583

1584

1585

1586

1587

1588

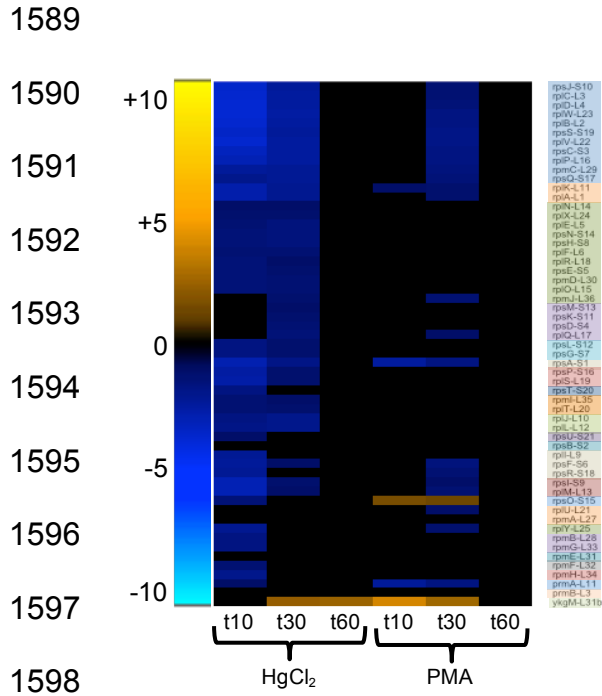

**Figure 5: Ribosomal subunit protein genes.** Genes are grouped and colored by operon (see larger Figure S11 and Table S13 for details).

1612

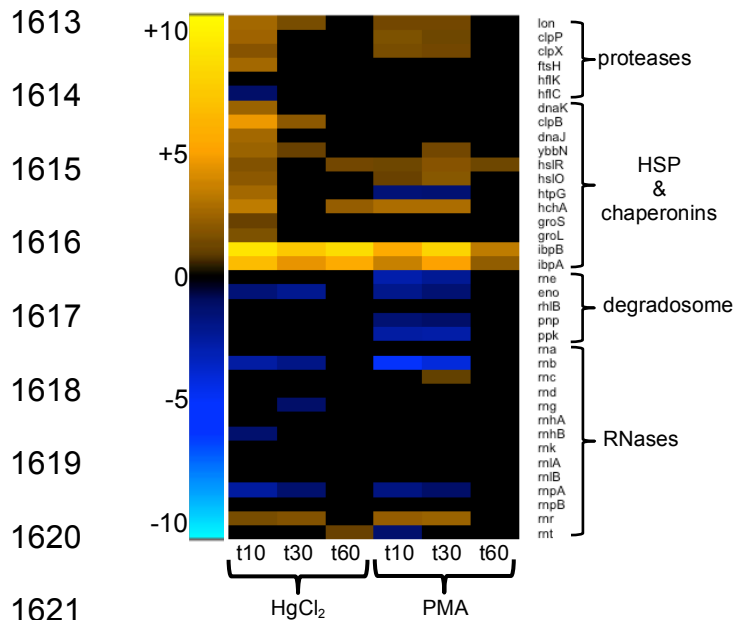

1621

1622

1623 **Figure 6: Protein and RNA turnover and repair.** (see larger Figure S12 and Table

1624 S13 for details).

1625

1626

1627

1628

1629

1630

1631

1632

1633

1634

1635

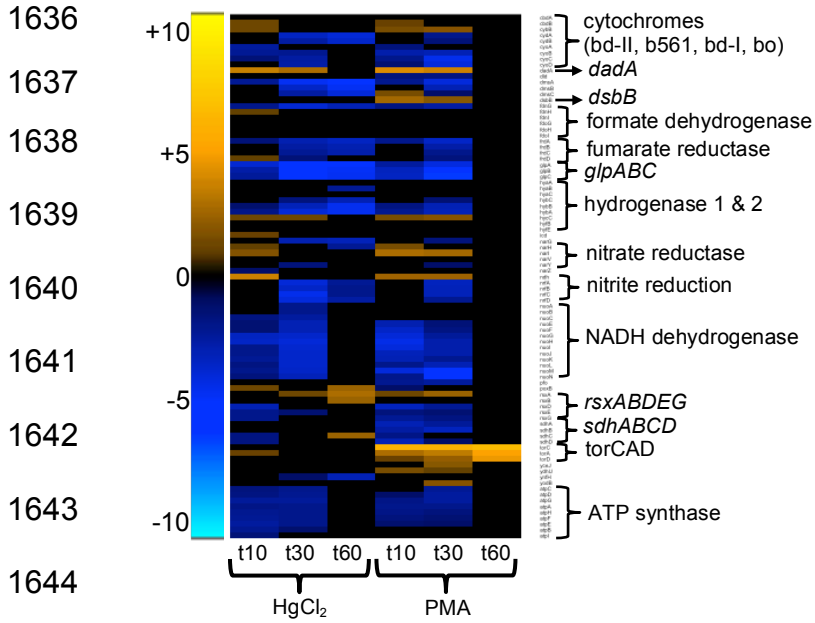

**Figure 7: Electron transport chain and ATP-synthase.** (see larger Figure S13 and Table S13 for details).

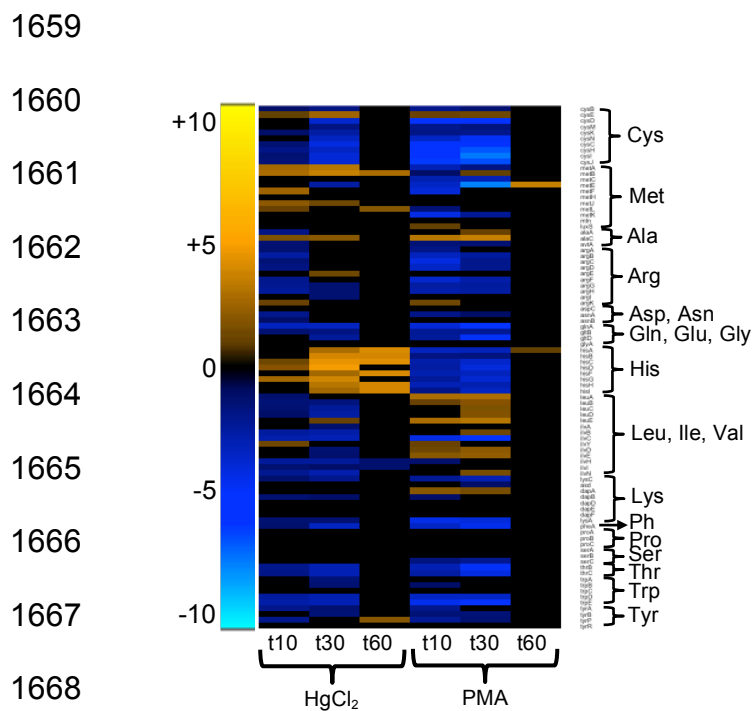

1670 **Figure 8: Amino acid biosynthesis.** (see larger Figure S22 and Table S13 for details).

1671

1672

1673

1674

1675

1676

1677

1678

1679

1680

1681

1682

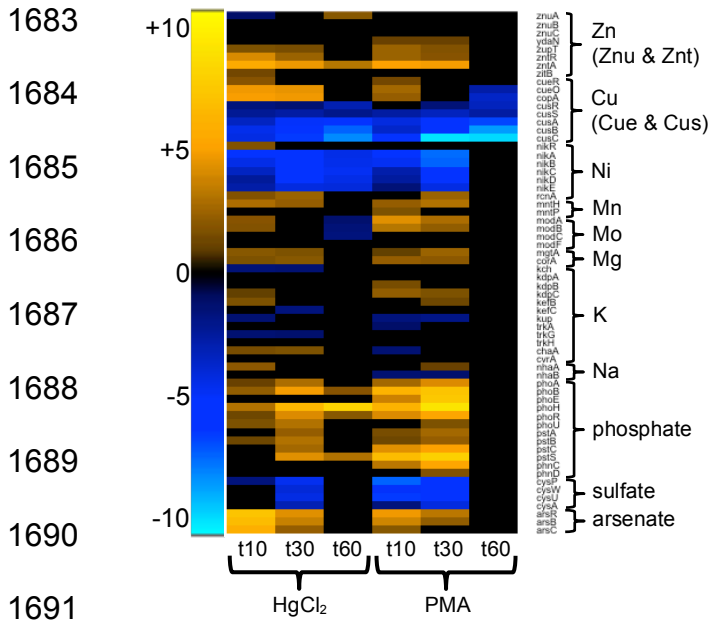

**Figure 9: Non-ferrous metals homeostasis.** (see larger Figure S23 and Table S13 for details).



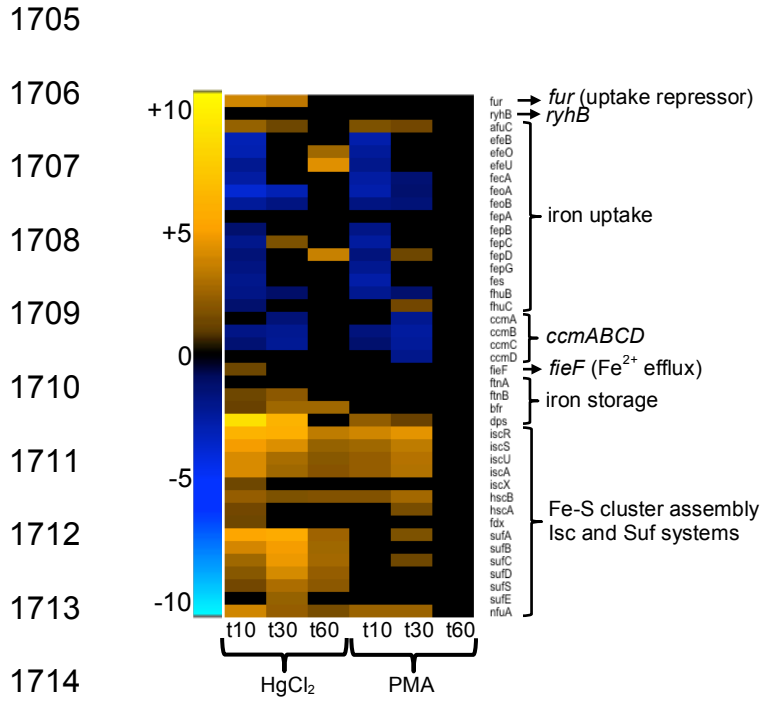

**Figure 10: Iron homeostasis.** (see larger Figure S24 and Table S13 for details).

1728

1729

1730

1731

1732

1733

1734

1735

1736

1737

1738

1739

1740

1741

1742

1743

1744

1745

1746

1747

1748

1749

1750

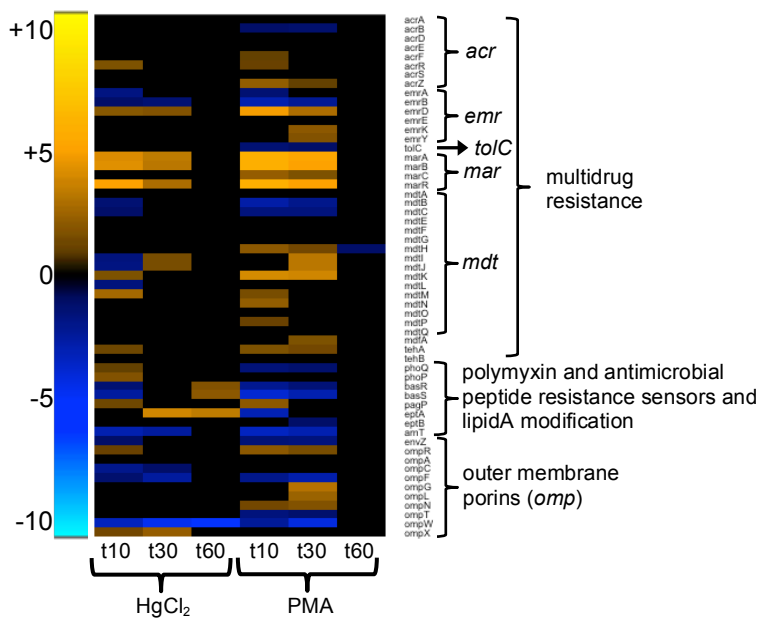

**Figure 11: Antibiotic resistance and outer membrane porins.** (see larger Figure S26 and Table S13 for details).

1751

1752

1753

1754

1755

1756

1757

1758

1759

1760

1761

1762

1763

1764

1765

1766

1767

1768

1769

1770

1771

1772

1773

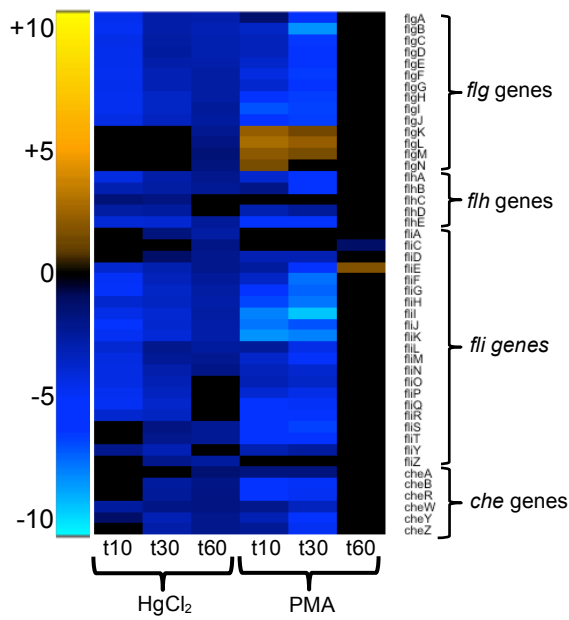

**Figure 12: Flagella components and chemotaxis.** (see larger Figure S27 and Table S13 for details).

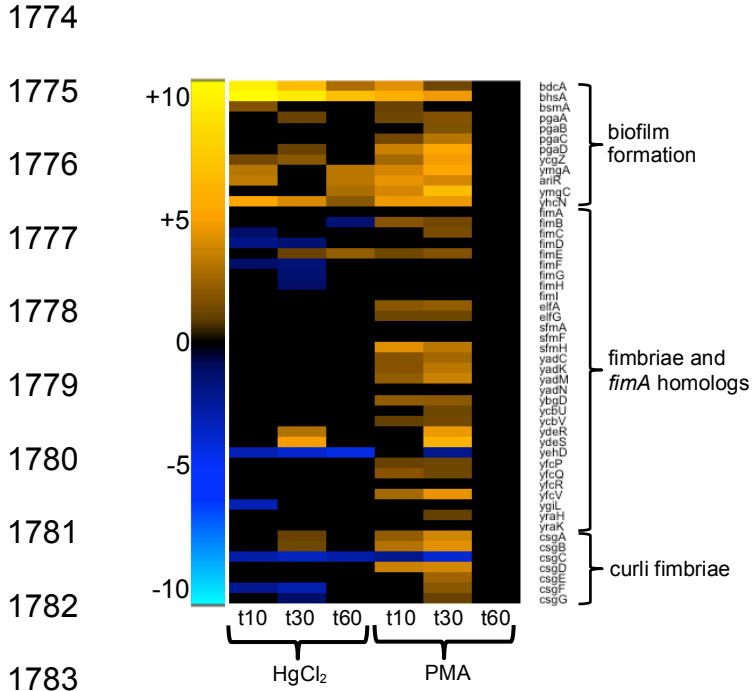

1785 **Figure 13: Biofilm formation and fimbriae.** (see larger Figure S28 and Table S13 for  
1786 details).

1787

1788

1789

1790

1791

1792

1793

1794

1795

1796

1797

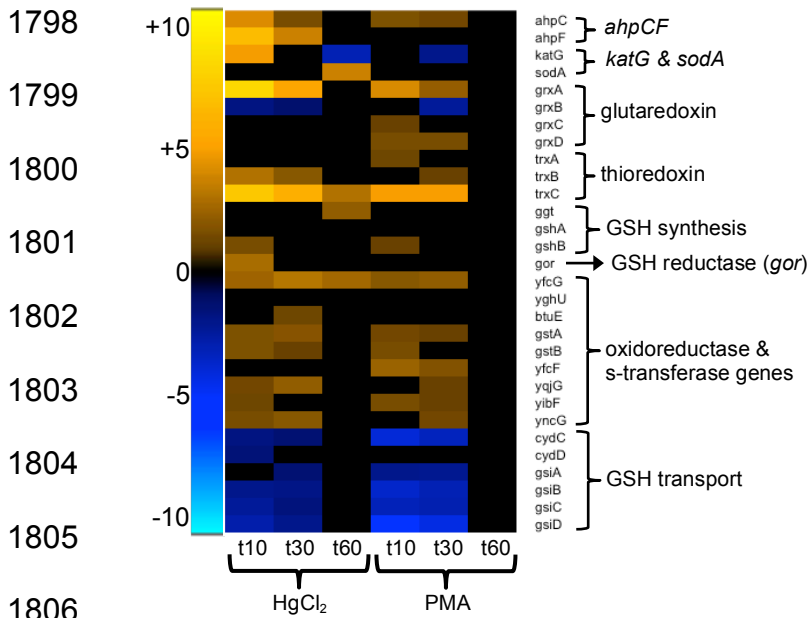

1806

1807

1808 **Figure 14: Oxidative stress defense and thiol homeostasis.** (see larger Figure S29

1809 and Table S13).

1810

1811

1812

1813

1814

1815

1816

1817

1818

1819
